# Supplementary material for: Geographic and Genetic Population Differentiation of the Amazonian Chocolate Tree (Theobroma cacao L)
Source: PLoS One. 2008 Oct 1;3(10):e3311. doi: 10.1371/journal.pone.0003311 (PMC2551746; doi:10.1371/journal.pone.0003311)
Supplement: Table S2 — Detailed list of the 289 individuals that were excluded from the final analyses and reasons for exclusion. (0.07 MB XLS) [file pone.0003311.s002.xls]

## Sheet: Sheet1
Clone Name	Lab Id	Locality of Original Collection	Origin of the Sample	Identical to Correctly Clustered Clone	Lab Id	Clone with Same Name Correctly Clustered	Lab Id	Reason to Exclude from Analysis
AGU 17	TC01173	Aguarico R., Ecuador	Pichilingue, Ecuador	UCA 1	TC01141			Mislabeled clone putatively from the Peruvian regions prospected by Chalmers [35]
AGU 31	TC01160	Aguarico R., Ecuador	Pichilingue, Ecuador			AGU 31	TC01448	Mislabeled clone or sample
AGU 5	TC00475	Aguarico R., Ecuador	Campito, Pichilingue, Ecuador			AGU 5	TC02952	Mislabeled clone putatively from the Peruvian regions prospected by Chalmers [35]
AMA 10	TC01169	Amazonas, Peru	Pichilingue, Ecuador	AMA 10	TC02955			Duplicated clone
AMA 10	TC00481	Amazonas R., Peru	Campito, Pichilingue, Ecuador			AMA 10	TC01169	Mislabeled duplicated clone or sample
AMA 11	TC00376	Amazonas R., Peru	Pichilingue, Ecuador			AMA 11	TC01168	Duplicated clone
AMA 12	TC00482	Amazonas R., Peru	Campito, Pichilingue, Ecuador	AMA 5	TC01172			Mislabeled clone putatively from the Peruvian regions prospected by Chalmers [35]
AMA 288	TC00459	Amazonas R., Peru	Campito, Pichilingue, Ecuador					Trinitario
AMA 1	TC00371	Amazonas R., Peru	Pichilingue, Ecuador					Mislabeled clone putatively from the Peruvian regions prospected by Chalmers [35]
AMA 5	TC01172	Amazonas, Peru	Pichilingue, Ecuador	AMA 12	TC00482			Mislabeled clone putatively from the Peruvian regions prospected by Chalmers [35]
B 23/1 D19	TC05363	Ecuador	CRU, Trinidad					Refractario clone
BOB 3	TC00386	Bobonaza R., Ecuador	Pichilingue, Ecuador					Mislabeled clone putatively from the Nanay series
BOB 3	TC00480	Bobonaza R., Ecuador	Pichilingue, Ecuador					Mislabeled clone or sample
BOLT 360	TC01163	Ecuador	Pichilingue, Ecuador	AMA 13	TC01162			Mislabeled duplicated clone or sample
BOLT 593	TC01165	Ecuador	Pichilingue, Ecuador	NUP 2	TC01166			Mislabeled duplicated clone or sample
CAB 0354 PL6	TC02643	Itaquai R., Brazil						Mislabeled clone putatively Amelonado
CAB 0350-PL 2	TC02640	Curuça R., Brazil		CAB 0349 PL3	TC02639			Mislabeled duplicated clone or sample
CAB 0494 PL 3	TC02674	Japura R., Brazil		CAB 0488 PL4	TC02672			Mislabeled duplicated clone or sample
CAB 0212 PL 4	TC02607	Purus R., Brazil		CAB 0211 PL1	TC02606			Mislabeled duplicated clone or sample
CHALMERS 10490	TC01161		Pichilingue, Ecuador					No passport data
CHALMERSDESCONOCIDO 1	TC01152		Pichilingue, Ecuador					No passport data
CHALMERSDESCONOCIDO 3	TC01185		Pichilingue, Ecuador					No passport data
CHALMERSDESCONOCIDO 4	TC01180		Pichilingue, Ecuador					No passport data
CHALMERSDESCONOCIDO 5	TC01178		Pichilingue, Ecuador					No passport data
CHALMERSDESCONOCIDO 6	TC01179		Pichilingue, Ecuador					No passport data
CJ 7 PL1	TC02533	Cachoeira do Jari, Para, Brazil		CAB146 PL2	TC02590			Mislabeled duplicated clone or sample
COCA 3333	TC01156	Coca R., Ecuador	Pichilingue, Ecuador	TAP 7	TC00373			Mislabeled duplicated clone or sample
				TAP 1	TC01146
				TAP 7	TC01144
				TAP 11	TC01151
				TAP 11	TC02954
				TAP 12	TC02975
				TAP 12	TC01145
				TAP 21	TC02976
				NAP 41	TC01158
COL7	TC03047	Santa Marta, Colombia	CIRAD Montpellier					Over 5% of missing data
COL 9	TC03049	Santa Marta, Colombia	CIRAD Montpellier					Trinitario
CONS 3	TC01164		Pichilingue, Ecuador					No passport data
CURARAY 15	TC00472	Curaray R., Ecuador	Campito, Pichilingue, Ecuador					Mislabeled clone putatively from the IMC series
CURARAY 3	TC00469	Curaray R., Ecuador	Campito, Pichilingue, Ecuador					Mislabeled clone putatively from the IMC series
CURARAY 6	TC00470	Curaray R., Ecuador	Campito, Pichilingue, Ecuador					Mislabeled clone putatively from the IMC series
CURARAY I	TC01177	Curaray R., Ecuador	Campito, Pichilingue, Ecuador					Mislabeled clone putatively from the IMC series
DESCONOCIDO	TC01192		Pichilingue, Ecuador					No passport data
EET 156XEET 166	TC01193	Ecuador	Pichilingue, Ecuador					Hybrid
EET 161XEET 166	TC01198	Ecuador	Pichilingue, Ecuador					Hybrid
EET 192XEET 237	TC01195	Ecuador	Pichilingue, Ecuador					Hybrid
EET 192XEET 237	TC01203	Ecuador	Pichilingue, Ecuador					Hybrid
EET 233	TC02959	Ecuador	Pichilingue, Ecuador					Hybrid
EET 233 PL 1	TC03003	Ecuador	Peru					Hybrid
EET 238 XSCA 6	TC01200	Ecuador	Pichilingue, Ecuador					Hybrid
EET 238XSCA 6	TC01202	Ecuador	Pichilingue, Ecuador					Hybrid
EET 250XEET 110	TC01189	Ecuador	Pichilingue, Ecuador					Hybrid
EET 260XEET 110	TC01190	Ecuador	Pichilingue, Ecuador					Hybrid
EET 280XEET 274	TC01191	Ecuador	Pichilingue, Ecuador					Hybrid
EET 280XEET 274	TC01201	Ecuador	Pichilingue, Ecuador					Hybrid
EET 313XSCA 6	TC01197	Ecuador	Pichilingue, Ecuador					Hybrid
EET 387	TC02960	Ecuador	Pichilingue, Ecuador					Hybrid
EET 48XEET 195	TC01194	Ecuador	Pichilingue, Ecuador					Hybrid
EET 6 XEET 6	TC01199	Ecuador	Pichilingue, Ecuador					Hybrid
EPC XEET 192	TC01196	Ecuador	Pichilingue, Ecuador					Hybrid
GAL 2	TC03038		CIRAD Montpellier					Trinitario
GS 37	TC00458	Grenada	Campito, Pichilingue, Ecuador					Trinitario
HH 1	TC03466							Hybrid
ICS 14	TC00446	Trinidad	Pichilingue, Ecuador					Trinitario
ICS 144	TC00445	Trinidad	Campito, Pichilingue, Ecuador	SCA 8	TC00444			Mislabeled duplicated clone or sample
				SCA 8	TC00550
ICS 60	TC00552	Trinidad	CRU, Trinidad					Trinitario
ICS 6	TC00551	Trinidad	CRU, Trinidad					Trinitario
ICS 95	TC02961	Trinidad	Pichilingue, Ecuador					Trinitario
ICS 95 PL 1	TC03006	Trinidad	Peru					Trinitario
II 1	TC03467							Hybrid
IMC 102	TC00553	Iquitos, Peru	CRU, Trinidad					Rootstock
IMC 104	TC00524	Iquitos, Peru	CRU, Trinidad					Over 5% of missing data
IMC 11	TC00525	Iquitos, Peru	CRU, Trinidad	IMC 2	TC00706			Different from [19] sample
IMC 13	TC01181	Iquitos, Peru	Pichilingue, Ecuador	IMC 13	TC00487			Mislabeled duplicated clone or sample
IMC 14	TC00488	Iquitos, Peru	CRU, Trinidad	IMC 11	TC00704			Mislabeled duplicated clone or sample
IMC 16	TC00557	Iquitos, Peru	CRU, Trinidad	NA 90	TC00655			Mislabeled duplicated clone or sample
IMC 22	TC00489	Iquitos, Peru	CRU, Trinidad	NA 8	TC00648			Mislabeled duplicated clone or sample
IMC 22	TC01182	Iquitos, Peru	Campito, Pichilingue, Ecuador	P 16A	TC00463			Mislabeled duplicated clone or sample
IMC 3	TC00526	Iquitos, Peru	CRU, Trinidad					Different from [19] sample
IMC 36	TC05131	Iquitos, Peru	CRU, Trinidad	IMC 36	TC00709			Mislabeled duplicated clone or sample
IMC 41	TC00529	Iquitos, Peru	CRU, Trinidad					Different from [19] sample
IMC 41	TC00752	Iquitos, Peru	CRU, Trinidad	MO 4	TC00763			Mislabeled duplicated clone or sample
IMC 44	TC00468	Iquitos, Peru	Campito, Pichilingue, Ecuador	IMC 44	TC00558			Mislabeled duplicated clone or sample
IMC 45	TC00559	Iquitos, Peru	CRU, Trinidad					Rootstock
IMC 45	TC05129	Iquitos, Peru	CRU, Trinidad					Mislabeled clone putatively from the Scavina series
IMC 51	TC00532	Iquitos, Peru	CRU, Trinidad	IMC 51	TC00753			Mislabeled duplicated clone or sample
IMC 54	TC00889	Iquitos, Peru	CRU, Trinidad					Different from [19] sample
IMC 57	TC00466	Iquitos, Peru	Campito, Pichilingue, Ecuador	POUND 10/B	TC00858			Mislabeled duplicated clone or sample
				NA 771	TC00541
IMC 57	TC00561	Iquitos, Peru	CRU, Trinidad					Rootstock
IMC 57	TC00891	Iquitos, Peru	CRU, Trinidad					Rootstock
IMC 67	TC00533	Iquitos, Peru	CRU, Trinidad					Different from [19] sample
IMC 76	TC00894	Iquitos, Peru	CRU, Trinidad	PA 2	TC00971			Mislabeled duplicated clone or sample
IMC 81	TC00757	Iquitos, Peru	CRU, Trinidad	MO 87	TC00764			Mislabeled duplicated clone or sample
				MO 81	TC00995
IMC 9	TC00497	Iquitos, Peru	CRU, Trinidad					Rootstock
IMC 97	TC00536	Iquitos, Peru	CRU, Trinidad					Different from [19] sample
IMC 97	TC00758	Iquitos, Peru	CRU, Trinidad	IMC 65	TC00892			Mislabeled duplicated clone or sample
IMC 98	TC00537	Iquitos, Peru	CRU, Trinidad					Different from [19] sample
JA 546	TC00456	Ecuador	Campito, Pichilingue, Ecuador					Trinitario
LCTEEN 77	TC01117	Zamora R., Ecuador	Pichilingue, Ecuador	EBC 126	TC01091			Mislabeled duplicated clone or sample
LCTEEN 133	TC01122	Napo R., Ecuador	Pichilingue, Ecuador	LCTEEN 23	TC01479			Mislabeled duplicated clone or sample
LCTEEN 142	TC01108	Napo R., Ecuador	Pichilingue, Ecuador	LCTEEN 142	TC01464			Mislabeled duplicated clone or sample
LCTEEN 212/S 4	TC04635	Napo R., Ecuador	Reading, UK					Rootstock
LCTEEN 280	TC01470	Curaray R., Ecuador	Pichilingue, Ecuador	LCT EEN 180	TC01105			Mislabeled duplicated clone or sample
LCTEEN 30	TC01092	Capocuy R., Ecuador	Pichilingue, Ecuador	LCTEEN 30	TC01475			Mislabeled duplicated clone or sample
LCTEEN 36	TC01132	Anangu R., Ecuador	Pichilingue, Ecuador	LCTEEN 36	TC01440			Mislabeled duplicated clone or sample
LCTEEN 368	TC01099	Conambo R., Ecuador	Pichilingue, Ecuador	LCTEEN 368	TC01438			Mislabeled duplicated clone or sample
LCTEEN 38	TC01442	Anangu R., Ecuador	Pichilingue, Ecuador	LCTEEN 38	TC01498			Mislabeled duplicated clone or sample
LCTEEN 403	TC01109	Yasuni R., Ecuador	Pichilingue, Ecuador	LCTEEN 403	TC01509			Mislabeled duplicated clone or sample
LCTEEN 81	TC01115	Zamora R., Ecuador	Pichilingue, Ecuador	LCTEEN 81	TC01460			Mislabeled duplicated clone or sample
LCTEEN 94	TC01476	Curaray R., Ecuador	Pichilingue, Ecuador	LCTEEN 94	TC01133			Duplicated clone
LZ 2	TC00450	Limoncillo, Ecuador	Pichilingue, Ecuador					Trinitario
MA 11	TC00448	Amazonas R., Brazil	Campito, Pichilingue, Ecuador	MA 11 PL2	TC02505			Duplicated sample
MO 109	TC00760	Morona R., Peru	CRU, Trinidad					Rootstock
MO 129	TC01001	Morona R., Peru	CRU, Trinidad					Different from [19] sample
MO 14	TC00461	Morona R., Peru	Campito, Pichilingue, Ecuador					Mislabeled clone putatively from the Parinari series
MO 17	TC00761	Morona R., Peru	CRU, Trinidad	NA 519	TC00810			Mislabeled duplicated clone or sample
MO 20	TC00460	Morona R., Peru	Pichilingue, Ecuador					Mislabeled clone putatively from the Parinari series
MO 28	TC00762	Morona R., Peru	CRU, Trinidad					Rootstock
MO 3	TC01002	Morona R., Peru	CRU, Trinidad					Mislabeled clone putatively from the Parinari series
MO 4	TC00763	Morona R., Peru	CRU, Trinidad					Mislabeled clone putatively from the Parinari series
MO 81	TC00995	Morona R., Peru	CRU, Trinidad					Mislabeled clone putatively from the Parinari series
MO 81	TC05364	Morona R., Peru	CRU, Trinidad					Mislabeled clone putatively from the Parinari series
MO 84	TC00994	Morona R., Peru	CRU, Trinidad					Rootstock
MO 87	TC00764	Morona R., Peru	CRU, Trinidad					Mislabeled clone putatively from the Parinari series
MO 9	TC01000	Morona R., Peru	CRU, Trinidad					Mislabeled clone putatively from the Parinari series
MOO 122	TC01186	Moquique, Ecuador	Pichilingue, Ecuador					Rootstock
MOO 528	TC00455	Moquique, Ecuador	Pichilingue, Ecuador	IMC 5	TC00531			Mislabeled duplicated clone or sample
MQO 647	TC00454	Moquique, Ecuador	Pichilingue, Ecuador					Rootstock
N 29	TC03037		CIRAD Montpellier					Trinitario
NA 876	TC00653	Nanay R., Peru	CRU, Trinidad					Mislabeled clone putatively from the Parinari series
NA 104	TC00765	Nanay R., Peru	CRU, Trinidad					Different from [19] sample
NA 112	TC00766	Nanay R., Peru	CRU, Trinidad					Different from [19] sample
NA 113	TC00767	Nanay R., Peru	CRU, Trinidad					Different from [19] sample
NA 114	TC00768	Nanay R., Peru	CRU, Trinidad					Different from [19] sample
NA 132 D622	TC05374	Nanay R., Peru	CRU, Trinidad					Mislabeled clone putatively from the IMC series
NA 137	TC00574	Nanay R., Peru	CRU, Trinidad					Mislabeled clone putatively from the IMC series
NA 137	TC05373	Nanay R., Peru	CRU, Trinidad					Mislabeled clone putatively from the Parinari series
NA 140	TC00899	Nanay R., Peru	CRU, Trinidad					Different from [19] sample
NA 142	TC00576	Nanay R., Peru	CRU, Trinidad					Rootstock
NA 144	TC00577	Nanay R., Peru	CRU, Trinidad					Rootstock
NA 145	TC03228	Nanay R., Peru	CRU, Trinidad					Over 5% of missing data
NA 145	TC00900	Nanay R., Peru	CRU, Trinidad					Different from [19] sample
NA 159	TC00581	Nanay R., Peru	CRU, Trinidad					Rootstock
NA 176	TC00772	Nanay R., Peru	CRU, Trinidad	PA 176	TC00966			Mislabeled duplicated clone or sample
				NA 81	TC00941
NA 179	TC00773	Nanay R., Peru	CRU, Trinidad	IMC 30	TC00492			Different from [19] sample
NA 19	TC00778	Nanay R., Peru	CRU, Trinidad					Different from [19] sample
NA 21	TC00909	Nanay R., Peru	CRU, Trinidad					Rootstock
NA 218	TC00584	Nanay R., Peru	CRU, Trinidad					Mislabeled clone or sample
NA 228	TC00783	Nanay R., Peru	CRU, Trinidad					Different from [19] sample
NA 230	TC00784	Nanay R., Peru	CRU, Trinidad					Different from [19] sample
NA 25	TC02962	Nanay R., Peru	Pichilingue, Ecuador	COCA 3335	TC02956			Mislabeled duplicated clone or sample
NA 260	TC00588	Nanay R., Peru	CRU, Trinidad					Rootstock
NA 271	TC00916	Nanay R., Peru	CRU, Trinidad					Rootstock
NA 277	TC00917	Nanay R., Peru	CRU, Trinidad					Different from [19] sample
NA 300	TC00792	Nanay R., Peru	CRU, Trinidad					Rootstock
NA 312	TC00590	Nanay R., Peru	CRU, Trinidad	PA 312	TC00849			Mislabeled duplicated clone or sample
NA 320	TC00795	Nanay R., Peru	CRU, Trinidad					Rootstock
NA 339	TC00799	Nanay R., Peru	CRU, Trinidad					Rootstock
NA 371	TC00593	Nanay R., Peru	CRU, Trinidad					Rootstock
NA 372	TC00594	Nanay R., Peru	CRU, Trinidad					Mislabeled clone putatively from the Parinari series
NA 387	TC00539	Nanay R., Peru	CRU, Trinidad					Different from [19] sample
NA 395	TC00595	Nanay R., Peru	CRU, Trinidad					Rootstock
NA 423	TC00598	Nanay R., Peru	CRU, Trinidad					Mislabeled clone putatively from the Parinari series
NA 462	TC00603	Nanay R., Peru	CRU, Trinidad					Rootstock
NA 462 D784	TC05345	Nanay R., Peru	CRU, Trinidad					Different from [19] sample
NA 471	TC00808	Nanay R., Peru	CRU, Trinidad					Mislabeled clone putatively from the Morona series
NA 475	TC00926	Nanay R., Peru	CRU, Trinidad					Different from [19] sample
NA 48	TC00927	Nanay R., Peru	CRU, Trinidad					Different from [19] sample
NA 534	TC00811	Nanay R., Peru	CRU, Trinidad					Mislabeled clone putatively from the Parinari series
NA 540	TC00812	Nanay R., Peru	CRU, Trinidad					Rootstock
NA 669	TC00607	Nanay R., Peru	CRU, Trinidad					Rootstock
NA 680	TC00612	Nanay R., Peru	CRU, Trinidad					Rootstock
NA 686	TC03229	Nanay R., Peru	CRU, Trinidad					Over 5% of missing data
NA 686	TC00613	Nanay R., Peru	CRU, Trinidad					Rootstock
NA 691	TC00617	Nanay R., Peru	CRU, Trinidad					Rootstock
NA 692	TC00618	Nanay R., Peru	CRU, Trinidad					Different from [19] sample
NA 693	TC00619	Nanay R., Peru	CRU, Trinidad	NA 673	TC00816			Mislabeled duplicated clone or sample
NA 7/28	TC00819	Nanay R., Peru	CRU, Trinidad	NA 728	TC00638			Mislabeled duplicated clone or sample
NA 705	TC00625	Nanay R., Peru	CRU, Trinidad					Different from [19] sample
NA 706	TC00626	Nanay R., Peru	CRU, Trinidad					Rootstock
NA 71	TC00820	Nanay R., Peru	CRU, Trinidad					Different from [19] sample
NA 721	TC00635	Nanay R., Peru	CRU, Trinidad					Different from [19] sample
NA 724	TC00636	Nanay R., Peru	CRU, Trinidad					Different from [19] sample
NA 725	TC00637	Nanay R., Peru	CRU, Trinidad					Different from [19] sample
NA 726	TC00540	Nanay R., Peru	CRU, Trinidad					Very similar to SCA20 (none clustered to either NA or SCA)
NA 750	TC00822	Nanay R., Peru	CRU, Trinidad					Different from [19] sample
NA 758	TC00644	Nanay R., Peru	CRU, Trinidad	CURARAY I	TC01177			Mislabeled clone putatively from the IMC series
NA 759	TC00823	Nanay R., Peru	CRU, Trinidad	PA 124	TC00660			Mislabeled clone putatively from the Parinari series
				PA 169	TC00667
NA 769	TC01188	Nanay R., Peru	Pichilingue, Ecuador					Rootstock
NA 780	TC00647	Nanay R., Peru	CRU, Trinidad					Rootstock
NA 794	TC00935	Nanay R., Peru	CRU, Trinidad					Mislabeled clone putatively from the IMC series
NA 8/35	TC00937	Nanay R., Peru	CRU, Trinidad					Rootstock
NA 81	TC00941	Nanay R., Peru	CRU, Trinidad	SCA 10	TC00984			Putatively Trinitario clone grafted by mistake
				PA 81	TC00855
				NA 271	TC00916
NA 831	TC00649	Nanay R., Peru	CRU, Trinidad	NA 831	TC00826			Mislabeled duplicated clone or sample
NA 833	TC00650	Nanay R., Peru	CRU, Trinidad	NA 33	TC00797			Mislabeled duplicated clone or sample
NA 835	TC00827	Nanay R., Peru	CRU, Trinidad	NA 8/35	TC00937			Mislabeled duplicated clone or sample
NA 841	TC00651	Nanay R., Peru	CRU, Trinidad					Different from [19] sample
NA 851	TC00828	Nanay R., Peru	CRU, Trinidad					Mislabeled clone putatively from the Parinari series
NA 904	TC00830	Nanay R., Peru	CRU, Trinidad					Mislabeled clone putatively from the Morona series
NA 904	TC05147	Nanay R., Peru	CRU, Trinidad					Different from [19] sample
NA 91/6	TC00656	Nanay R., Peru	CRU, Trinidad					Mislabeled clone putatively from the Morona series
NA 961	TC00659	Nanay R., Peru	CRU, Trinidad					Different from [19] sample
NAP 1	TC00478	Napo R., Ecuador	Pichilingue, Ecuador					Mislabeled clone putatively from the Peruvian regions prospected by Chalmers [35]
NAP 137	TC00452	Napo R., Ecuador	Campito, Pichilingue, Ecuador					Mislabeled clone putatively from the Peruvian regions prospected by Chalmers [35]
NAP 23	TC02965	Napo R., Peru	Pichilingue, Ecuador	NAP 24	TC01486			Mislabeled duplicated clone or sample
NAP 3	TC00483	Napo R., Ecuador	Campito, Pichilingue, Ecuador					Mislabeled clone putatively from the Peruvian regions prospected by Chalmers [35]
NAP 3	TC01522	Napo R., Ecuador	Pichilingue, Ecuador	NAP 3	TC02964			Duplicated sample
NAP 4(ARBOL6)	TC00388	Napo R., Ecuador	Campito, Pichilingue, Ecuador					Mislabeled clone putatively from the Peruvian regions prospected by Chalmers [35]
NAP 40	TC01157	Napo R., Ecuador	Campito, Pichilingue, Ecuador					Mislabeled clone putatively from the Peruvian regions prospected by Chalmers [35]
NAP 41	TC01158	Napo R., Ecuador	Pichilingue, Ecuador	TAP 7	TC00373			Mislabeled clone putatively from the Peruvian regions prospected by Chalmers [35]
				TAP 1	TC01146
				TAP 7	TC01144
				TAP 11	TC01151
				TAP 11	TC02974
				TAP 12	TC02975
				TAP 12	TC01145
				TAP 21	TC02976
				COCA 3333	TC01156
NUP 2	TC01166		Pichilingue, Ecuador	BOLT 593	TC01165			Mislabeled duplicated clone or sample
P 10V	TC00464	Nanay R., Peru	Campito, Pichilingue, Ecuador					No passport data
P 16A	TC00463	Nanay R., Peru	Pichilingue, Ecuador	POUND 16/B	TC00862	POUND 16/B	TC00862	Mislabeled duplicated clone or sample
				POUND 25/A	TC00868
				IMC 22	TC01182
P 18	TC00542	Nanay R., Peru	CRU, Trinidad	POUND 18	TC00863			Duplicated clone
P 21B	TC00543	Nanay R., Peru	CRU, Trinidad	POUND 21/B	TC00867			Duplicated clone
P 25C	TC00544	Nanay R., Peru	CRU, Trinidad	POUND 25/C	TC00869			Duplicated clone
P 31A	TC00547	Contamana, Peru	CRU, Trinidad	POUND 31/A	TC00872			Duplicated clone
P 31C	TC00548	Contamana, Peru	CRU, Trinidad			PUND 31/C	TC00873	Mislabeled clone putatively from the Nanay series
PA 109	TC00832	Parinari, Peru	CRU, Trinidad					Mislabeled clone putatively from the Nanay series
PA 113	TC00833	Parinari, Peru	CRU, Trinidad					Over 5% of missing data
PA 114	TC00834	Parinari, Peru	CRU, Trinidad					Rootstock
PA 124	TC00660	Parinari, Peru	CRU, Trinidad					Different from [19] sample
PA 132	TC00959	Nanay R., Peru	CRU, Trinidad					Different from [19] sample
PA 156	TC00835	Parinari, Peru	CRU, Trinidad	PA 186	TC00969			Mislabeled duplicated clone or sample
PA 167	TC00666	Parinari, Peru	CRU, Trinidad					Rootstock
PA 175	TC00668	Parinari, Peru	CRU, Trinidad					Different from [19] sample
PA 187	TC00670	Parinari, Peru	CRU, Trinidad	PA 189	TC00672			Mislabeled duplicated clone or sample
PA 195 PL1	TC02588	Parinari, Peru		PA 195	TC00841			Duplicated sample
PA 205	TC00675	Parinari, Peru	CRU, Trinidad					Rootstock
PA 27	TC00844	Parinari, Peru	CRU, Trinidad	PA 88	TC00983			Mislabeled duplicated clone or sample
PA 270 OR 207	TC00508	Parinari, Peru	CRU, Trinidad	PA 207	TC00843			Mislabeled duplicated clone or sample
PA 275	TC00510	Parinari, Peru	CRU, Trinidad					Rootstock
PA 291	TC00677	Parinari, Peru	CRU, Trinidad	NA 746	TC00641			Different from [19] sample
PA 293	TC00513	Parinari, Peru	CRU, Trinidad	PA 293	TC00678			Duplicated sample
PA 3/10	TC00975	Parinari, Peru	CRU, Trinidad	PA 310	TC00848			Mislabeled duplicated clone or sample
PA 300	TC00976	Parinari, Peru	CRU, Trinidad					Different from [19] sample
PA 34	TC00682	Parinari, Peru	CRU, Trinidad					Different from [19] sample
PA 35	TC00850	Parinari, Peru	CRU, Trinidad					Rootstock
PA 37	TC00977	Parinari, Peru	CRU, Trinidad					Different from [19] sample
PA 4	TC00517	Parinari, Peru	CRU, Trinidad					Different from [19] sample
PA 5	TC00518	Parinari, Peru	CRU, Trinidad					Mislabeled clone putatively from the IMC series
PA 66	TC00519	Parinari, Peru	CRU, Trinidad	PA 65	TC00982			Mislabeled duplicated clone or sample
PA 68	TC00853	Parinari, Peru	CRU, Trinidad					Different from [19] sample
PA 81	TC00855	Parinari, Peru	CRU, Trinidad					Rootstock
POUND 10/C	TC00859	Nanay R., Peru	CRU, Trinidad	POUND 10/B	TC00858			Duplicated clone
POUND 18/A	TC00864	Nanay R., Peru	CRU, Trinidad	POUND 18	TC00863			Duplicated clone
POUND 18	TC00863	Nanay R., Peru	CRU, Trinidad	POUND 18/A	TC00864			Mislabeled duplicated clone or sample
POUND 25/A	TC00868	Nanay R., Peru	CRU, Trinidad	POUND 16/B	TC00862			Mislabeled duplicated clone or sample
POUND 27/C	TC00871	Nanay R., Peru	CRU, Trinidad					Different from [19] sample
POUND 31/A	TC00872	Contamana, Peru	CRU, Trinidad	POUND 31/C	TC00873			Duplicated clone
POUND 4/A	TC00875	Nanay R., Peru	CRU, Trinidad	POUND 12/A	TC00860			Mislabeled duplicated clone or sample (sample could be 4 or 12)
POUND 5/B	TC00876	Nanay R., Peru	CRU, Trinidad	POUND 5/C	TC00877			Duplicated clone
POUND 7/A	TC00878	Nanay R., Peru	CRU, Trinidad	POUND 7/B	TC00879			Duplicated clone
				POUND 7/C	TC00880
				NA 768	TC01187
POUND 7/B	TC00879	Nanay R., Peru	CRU, Trinidad	POUND 7/C	TC00880			Duplicated clone
POUND 9/B	TC00881	Nanay R., Peru	CRU, Trinidad	P 14.A	TC01184			Mislabeled duplicated clone or sample (sample could be 9 or 14)
Q 6	TC03468							Hybrid
RB 29	TC00447	Branco R., Brazil	Campito, Pichilingue, Ecuador					Mislabeled clone putatively Amelonado
SAN MIGUEL 3360/3[CHA]	TC05182	San Miguel R., Ecuador	Reading, UK					Mislabeled clone
SCA 10	TC00984	Contamana, Peru	CRU, Trinidad					Rootstock
SCA 11	TC00882	Contamana, Peru	CRU, Trinidad	SCA 12	TC00695			Different from [19] sample
SCA 12 1	TC03022	Contamana, Peru	Peru	SCA12	TC00695			Duplicated clone
SCA 12 2	TC03020	Contamana, Peru	Peru			SCA12	TC00695	Mislabeled clone putatively from the Scavina series
SCA 19	TC00549	Contamana, Peru	CRU, Trinidad	IMC 49	TC00887			Different from [19] sample
SCA 20	TC00883	Contamana, Peru	CRU, Trinidad					Almost identical to NA726 (none clustered to either NA or SCA clones)
SCA 23	TC00696	Contamana, Peru	CRU, Trinidad					Morphologically described as Nanay [50]
SCA 24	TC00523	Contamana, Peru	CRU, Trinidad	SCA8	TC00550			Mislabeled duplicated clone or sample
SCA 27	TC00697	Contamana, Peru	CRU, Trinidad					Rootstock
SCA 6	TC00985	Contamana, Peru	CRU, Trinidad	SCA 6 PLA2	TC03004			Duplicated clone
SCA 6 PL 1	TC03005	Contamana, Peru	Peru	SCA 6PLA 2	TC03004			Duplicated clone
SCA 8	TC00550	Contamana, Peru	CRU, Trinidad	SCA 8	TC00444			Duplicated clone
SM 8	TC00474	San Miguel R., Ecuador	Pichilingue, Ecuador					Mislabeled clone putatively from the Peruvian regions prospected by Chalmers [35]
TAP 10	TC01175	Ucayali R., Peru	Pichilingue, Ecuador	NAP 1	TC02963			Mislabeled duplicated clone or sample
TAP 10	TC02973	Tapiche R., Peru	Pichilingue, Ecuador					Mislabeled clone putatively from the Ecuadorian regions prospected by Chalmers [35]
TAP 1	TC01146	Tapiche R., Peru	Pichilingue, Ecuador	TAP 7	TC01144			Mislabeled duplicated clone
				TAP 7	TC00373
				TAP 11	TC01151
				TAP 11	TC02974
				TAP 12	TC02975
				TAP 12	TC01145
				TAP 21	TC02976
				COCA 3333	TC01156
				NAP 41	TC01158
TAP 7	TC01144	Tapiche R., Peru	Ecuador	Idem	Idem			Idem
TAP 11	TC01151	Tapiche R., Peru	Ecuador	Idem	Idem			Mislabeled duplicated clone
TAP 11	TC02974	Tapiche R., Peru	Ecuador	Idem	Idem			Mislabeled duplicated clone
TAP 12	TC02975	Tapiche R., Peru	Ecuador	Idem	Idem			Idem
TAP 12	TC01145	Tapiche R., Peru	Ecuador	Idem	Idem			Idem
TAP 21	TC02976	Tapiche R., Peru	Ecuador					Unknown tag name
TAP 3	TC01174	Tapiche R., Peru	Campito, Pichilingue, Ecuador	AGU5	TC02952			Mislabeled clone putatively from the Ecuadorian regions prospected by Chalmers [35]
TAP 6	TC02972	Tapiche R., Peru	Ecuador	UNAP 1(REDPOD)	TC00370			Mislabeled duplicated clone or sample
				UNAP 2	TC01171
TIP1	TC00380	Tiputuni R., Ecuador	Pichilingue, Ecuador	TIP1	TC01521			Duplicated clone
TIP 2 (ARBOL3)	TC00387	Tiputuni R., Ecuador	Pichilingue, Ecuador					Mislabeled clone putatively from the Peruvian regions prospected by Chalmers [35]
TIP 4	TC02977	Tiputuni R., Ecuador	Campito, Pichilingue, Ecuador					Mislabeled clone putatively from the Peruvian regions prospected by Chalmers [35]
TSCH 1164	TC00457	Trinidad	Campito, Pichilingue, Ecuador					Hybrid
U 52	TC03008		Peru					Mislabeled duplicated clone or sample
U 60	TC03023	Yanatili R., Peru	Peru	U 59	TC03014			Mislabeled duplicated clone or sample
U 65	TC03013	Vilcanota R., Peru	Peru	U 68	TC02985			Mislabeled duplicated clone or sample
UCA 2	TC01153	Ucayali R., Peru	Campito, Pichilingue, Ecuador					Mislabeled clone putatively from the Ecuadorian regions prospected by Chalmers [35]
UCA 4	TC01155	Ucayali R., Peru	Ecuador	TAP 2	TC01154			Mislabeled duplicated clone or sample
UCA 8	TC01176	Ucayali R., Peru	Ecuador					Mislabeled clone putatively from the Ecuadorian regions prospected by Chalmers [35]
UF 676	TC00018	Trinidad	CIRAD Montpellier					Trinitario
UNAP 1 (REDPOD)	TC00370	Iquitos, Peru	Pichilingue, Ecuador	UNAP 2	TC01171			Hybrid
UNAP 2	TC01171	Iquitos, Peru	Campito, Pichilingue, Ecuador	UNAP 1(RedPod)	TC00370			Mislabeled duplicated clone or sample
UNAP 2	TC02978	Iquitos, Peru	Ecuador					Mislabeled clone putatively from the Ecuadorian regions prospected by Chalmers [35]
VILL 6	TC02979	Villano R., Ecuador	Ecuador	TIP 1	TC01521			Mislabeled duplicated clone or sample
