# Supplementary material for: Geographic and Genetic Population Differentiation of the Amazonian Chocolate Tree (Theobroma cacao L)
Source: PLoS One. 2008 Oct 1;3(10):e3311. doi: 10.1371/journal.pone.0003311 (PMC2551746; doi:10.1371/journal.pone.0003311)
Supplement: Table S3 — List of the 952 retained clones. (0.77 MB XLS) [file pone.0003311.s003.xls]

## Sheet: Sheet1
Clone Name	Lab Id	Approximate Longitude (decimal degrees)	Approximate Latitude (decimal degrees)	Country of Original Collection	N. C. S.	Cluster	Highest Coefficient of Membership	Subcluster	Highest Coefficient of Membership
AGU 5	TC02952	-76.5	-0.33	Ecuador	1	Curaray	0.991	Coca R - Napo R	0.985
AGU 8	TC00476	-76.5	-0.33	Ecuador	1	Curaray	0.558	N/A	N/A
AGU 17	TC02953	-76.42	-0.17	Ecuador	1	Curaray	0.931	Coca R - Napo R	0.626
AGU 22	TC01170	-76.42	-0.17	Ecuador	1	Curaray	0.86	Coca R - Napo R	0.536
AGU 31	TC01448	-76.42	-0.17	Ecuador	1	Curaray	0.964	Curaray R - Napo R	0.69
AM 1/57 [POU]	TC04599	Not available	Not available	Ecuador	1	Iquitos	0.996	IMC I	0.998
AMAZ 2	TC01139	-73.17	-3.75	Peru	2	Iquitos	0.725	*	0.997
AMAZ 2	TC02954	-73.17	-3.75	Peru	2	Iquitos	0.711	*	0.997
AMAZ 4	TC01150	-73.17	-3.75	Peru	1	Iquitos	0.756	Amazonas	0.879
AMAZ 4 (ARBOL 2)	TC00375	-73.17	-3.75	Peru	2	Iquitos	0.791	Amazonas	0.997
AMAZ 9	TC00379	-73.17	-3.75	Peru	3	Iquitos	0.495	N/A	N/A
AMAZ 10	TC02955	-73.17	-3.75	Peru	2	Iquitos	0.73	Amazonas	0.994
AMAZ 11	TC01168	-73.17	-3.75	Peru	2	Iquitos	0.567	N/A	N/A
AMAZ 12	TC00374	-73.17	-3.75	Peru	1	Iquitos	0.682	N/A	N/A
AMAZ 13	TC01162	-73.17	-3.75	Peru	2	Iquitos	0.735	*	0.966
AMAZ 14	TC01167	-73.17	-3.75	Peru	2	Iquitos	0.77	*	0.99
AMAZ 14	TC00377	-73.17	-3.75	Peru	2	Iquitos	0.8	Amazonas	0.989
AMAZ 15 [CHA]	TC04601	-73.17	-3.75	Peru	2	Iquitos	0.751	Amazonas	0.942
AMAZ 5/2 [CHA]	TC04600	-73.17	-3.75	Peru	2	Iquitos	0.777	Amazonas	0.998
AMAZ 15/15 [CHA]	TC04602	-73.17	-3.75	Peru	1	Iquitos	0.818	Amazonas	0.888
B 3	TC03071	-88.67	17.12	Belize	1	Criollo	0.997	Lacandona	0.478
B 48	TC03072	-88.67	17.12	Belize	1	Criollo	0.992	Belize	0.953
B7 A2	TC02209	-53.28	2.2	French Guiana	2	Guiana	0.991	Camopi R-Euleupousing R	0.703
B7 A6	TC02214	-53.28	2.2	French Guiana	2	Guiana	0.997	Camopi R-Euleupousing R	0.685
B7 B2	TC02211	-53.28	2.2	French Guiana	2	Guiana	0.997	Camopi R	0.558
B7 B3	TC02212	-53.28	2.2	French Guiana	2	Guiana	0.994	Camopi R-Euleupousing R	0.96
B7 B4	TC02213	-53.28	2.2	French Guiana	2	Guiana	0.997	Camopi R-Euleupousing R	0.982
B7 B5	TC02210	-53.28	2.2	French Guiana	2	Guiana	0.997	Camopi R-Euleupousing R	0.508
BE 2 PL1	TC02549	-48	-1.5	Brazil	2	Amelonado	0.521	N/A	N/A
BE 3 PL6	TC02548	-48	-1.5	Brazil	2	Amelonado	0.646	N/A	N/A
BE 4 PL3	TC02547	-48	-1.5	Brazil	2	Amelonado	0.827	Amelonado Type III	0.879
BE 5 PL2	TC02546	-48	-1.5	Brazil	2	Amelonado	0.976	Amelonado Type II	0.453
BE 7 PL7	TC02545	-48	-1.5	Brazil	2	Amelonado	0.971	Amelonado Type I	0.664
BE 8 PL2	TC02544	-48	-1.5	Brazil	3	Amelonado	0.281	N/A	N/A
BE 9 PL1	TC02543	-48	-1.5	Brazil	1	Marañón	0.639	N/A	N/A
BE 10 PL1	TC02542	-48	-1.5	Brazil	2	Amelonado	0.703	Amelonado Type III	0.89
BEN 1	TC03035	-71.39	8.37	Venezuela	1	Criollo	0.996	Santa Marta	0.73
BEN 5	TC03036	-71.39	8.37	Venezuela	1	Criollo	0.998	Santa Marta	0.95
BOB 8 (ARBOL 2)	TC00381	-76	-0.35	Ecuador	2	Nacional	0.551	N/A	N/A
C.Sul 1 PL2	TC02509	-72.65	-7.66	Brazil	1	Iquitos	0.536	N/A	N/A
C.Sul 5 PL1	TC02508	-72.65	-7.66	Brazil	3	Purús	0.521	N/A	N/A
C.Sul 9 PL2	TC02507	-72.65	-7.66	Brazil	3	Purús	0.453	N/A	N/A
C.Sul 10 PL1	TC02510	-72.65	-7.66	Brazil	1	Iquitos	0.528	N/A	N/A
CA S5	TC03061	-91.1	16.94	Mexico	1	Criollo	0.998	Lacandona	0.795
CAB 6 PL3	TC02541	-48	-3	Brazil	1	Marañón	0.508	N/A	N/A
CAB 16 PL2	TC02540	-48	-3	Brazil	2	Amelonado	0.871	Amelonado Type III	0.575
CAB 17 PL4	TC02587	-54.17	-2	Brazil	1	Marañón	0.574	N/A	N/A
CAB 18 PL3	TC02586	-54.17	-2	Brazil	1	Marañón	0.59	N/A	N/A
CAB 19 PL4	TC02585	-54.17	-2	Brazil	1	Marañón	0.655	N/A	N/A
CAB 0020 PL3	TC02605	-48.15	-2.41	Brazil	2	Amelonado	0.587	N/A	N/A
CAB 21 PL3	TC02584	-54.17	-2	Brazil	1	Marañón	0.47	N/A	N/A
CAB 22 PL2	TC02583	-54.17	-2	Brazil	1	Marañón	0.604	N/A	N/A
CAB 23 PL1	TC02582	-54.17	-2	Brazil	1	Marañón	0.516	N/A	N/A
CAB 24 PL3	TC02581	-54.17	-2	Brazil	2	Amelonado	0.51	N/A	N/A
CAB 25 PL2	TC02580	-54.17	-2	Brazil	1	Marañón	0.507	N/A	N/A
CAB 36 PL3	TC02539	-48	-3	Brazil	2	Amelonado	0.807	Amelonado Type III	0.977
CAB 39 PL9	TC02538	-48	-3	Brazil	2	Amelonado	0.994	Amelonado Type III	0.564
CAB 63 PL1	TC02572	-69	-9	Brazil	1	Purús	0.951	Caeté R - Purús R	0.937
CAB 64 PL1	TC02559	-69	-9	Brazil	1	Purús	0.992	Caeté R - Purús R	0.993
CAB 66 PL1	TC02560	-69	-9	Brazil	3	Iquitos	0.326	N/A	N/A
CAB 67 PL2	TC02561	-69	-9	Brazil	1	Purús	0.981	Caeté R - Purús R	0.978
CAB 68 PL3	TC02562	-69	-9	Brazil	1	Purús	0.994	Caeté R - Purús R	0.896
CAB 69 PL2	TC02563	-69	-9	Brazil	1	Purús	0.995	Caeté R - Purús R	0.984
CAB 70 PL2	TC02564	-69	-9	Brazil	1	Purús	0.996	Caeté R - Purús R	0.985
CAB 71 PL3	TC02565	-69	-9	Brazil	1	Purús	0.994	Caeté R - Purús R	0.986
CAB 72 PL2	TC02566	-69	-9	Brazil	1	Purús	0.995	Caeté R - Purús R	0.936
CAB 76 PL3	TC02567	-69	-9	Brazil	1	Purús	0.995	Caeté R - Purús R	0.995
CAB 77 PL5	TC02568	-69	-9	Brazil	1	Purús	0.995	Caeté R - Purús R	0.995
CAB 78 PL1	TC02569	-69	-9	Brazil	1	Purús	0.994	Caeté R - Purús R	0.88
CAB 79 PL5	TC02570	-69	-9	Brazil	1	Purús	0.995	Caeté R - Purús R	0.993
CAB 80 PL3	TC02571	-69	-9	Brazil	1	Purús	0.992	Caeté R - Purús R	0.98
CAB 122 PL2	TC02554	-67.67	-8	Brazil	1	Purús	0.996	Caeté R - Purús R	0.985
CAB 123 PL2	TC02553	-67.67	-8	Brazil	1	Purús	0.987	Caeté R - Purús R	0.989
CAB 124 PL3	TC02552	-67.67	-8	Brazil	1	Purús	0.99	Caeté R - Purús R	0.992
CAB 126 PL2	TC02551	-67.67	-8	Brazil	2	Marañón	0.495	N/A	N/A
CAB 127 PL2	TC02550	-67.67	-8	Brazil	1	Purús	0.996	Caeté R - Purús R	0.99
CAB 128 PL4	TC02555	-67.67	-8	Brazil	1	Purús	0.996	Caeté R - Purús R	0.99
CAB 130 PL2	TC02556	-67.67	-8	Brazil	1	Purús	0.99	Caeté R - Purús R	0.991
CAB 131 PL2	TC02557	-67.67	-8	Brazil	1	Purús	0.989	Caeté R - Purús R	0.983
CAB 132 PL1	TC02558	-67.67	-8	Brazil	1	Purús	0.996	Caeté R - Purús R	0.977
CAB 145 PL1	TC02589	-67.83	-9.5	Brazil	1	Purús	0.993	Acre R	0.946
CAB 146 PL2	TC02590	-67.83	-9.5	Brazil	1	Purús	0.996	Acre R	0.994
CAB 147 PL1	TC02591	-67.83	-9.5	Brazil	1	Purús	0.988	Acre R	0.946
CAB 148 PL2	TC02592	-67.83	-9.5	Brazil	1	Purús	0.977	Acre R	0.993
CAB 149 PL2	TC02593	-67.83	-9.5	Brazil	1	Purús	0.991	Acre R	0.99
CAB 150 PL4	TC02594	-67.83	-9.5	Brazil	1	Purús	0.915	Acre R	0.993
CAB 151 PL6	TC02595	-67.83	-9.5	Brazil	1	Purús	0.986	Acre R	0.873
CAB 152 PL3	TC02596	-67.83	-9.5	Brazil	1	Purús	0.99	Acre R	0.99
CAB 153 PL2	TC02597	-67.83	-9.5	Brazil	1	Purús	0.993	Acre R	0.996
CAB 154 PL4	TC02598	-67.83	-9.5	Brazil	1	Purús	0.99	Acre R	0.816
CAB 155 PL4	TC02599	-67.83	-9.5	Brazil	1	Purús	0.971	Acre R	0.976
CAB 156 PL7	TC02600	-67.83	-9.5	Brazil	1	Purús	0.993	Acre R	0.895
CAB 181 PL1	TC02604	-71.5	-8.5	Brazil	2	Purús	0.465	N/A	N/A
CAB 182 PL4	TC02603	-71.5	-8.5	Brazil	2	Purús	0.532	N/A	N/A
CAB 183 PL1	TC02601	-71.5	-8.5	Brazil	2	Contamana	0.818	Embira R	0.994
CAB 184 PL5	TC02602	-71.5	-8.5	Brazil	2	Contamana	0.726	Embira R	0.993
CAB 185 PL2	TC02516	-71.5	-8.5	Brazil	2	Contamana	0.703	Embira R	0.994
CAB 186 PL2	TC02515	-71.5	-8.5	Brazil	2	Contamana	0.775	Embira R	0.997
CAB 187 PL1	TC02514	-71.5	-8.5	Brazil	2	Contamana	0.745	Embira R	0.996
CAB 188 PL4	TC02513	-71.5	-8.5	Brazil	2	Contamana	0.729	Embira R	0.989
CAB 190 PL5	TC02512	-71.5	-8.5	Brazil	2	Contamana	0.693	N/A	N/A
CAB 191 PL5	TC02575	-67.67	-8	Brazil	1	Purús	0.927	Purús R	0.959
CAB 193 PL4	TC02574	-67.67	-8	Brazil	1	Purús	0.924	Purús R	0.936
CAB 194 PL1	TC02573	-67.67	-8	Brazil	1	Purús	0.985	Purús R	0.71
CAB 195 PL2	TC02576	-67.67	-8	Brazil	1	Purús	0.76	Purús R	0.961
CAB 196 PL4	TC02577	-67.67	-8	Brazil	1	Purús	0.992	Purús R	0.884
CAB 197 PL3	TC02578	-67.67	-8	Brazil	1	Purús	0.986	Purús R	0.971
CAB 198 PL4	TC02579	-67.67	-8	Brazil	1	Purús	0.988	Purús R	0.613
CAB 200 PL1	TC02511	-71.5	-8.5	Brazil	1	Purús	0.737	*	0.557
CAB 0211 PL1	TC02606	-67.67	-8	Brazil	1	Purús	0.981	Caeté R - Purús R	0.619
CAB 0213 PL4	TC02608	-67.67	-8	Brazil	1	Purús	0.989	Acre R	0.692
CAB 0219 PL3	TC02609	-63.04	-9.91	Brazil	2	Marañón	0.984	Ji-Paraná R	0.89
CAB 0221 PL1	TC02610	-63.04	-9.91	Brazil	2	Marañón	0.982	Ji-Paraná R	0.958
CAB 0224 PL2	TC02611	-63.04	-9.91	Brazil	2	Marañón	0.791	Ji-Paraná R	0.702
CAB 0232 PL7	TC02612	-63.04	-9.91	Brazil	2	Marañón	0.997	Ji-Paraná R	0.989
CAB 0233 PL1	TC02613	-63.04	-9.91	Brazil	2	Marañón	0.997	Ji-Paraná R	0.989
CAB 0234 PL4	TC02614	-63.04	-9.91	Brazil	2	Marañón	0.992	Ji-Paraná R	0.992
CAB 0236 PL6	TC02615	-63.04	-9.91	Brazil	2	Purús	0.57	N/A	N/A
CAB 0244 PL9	TC02616	-63.04	-9.91	Brazil	2	Marañón	0.995	Ji-Paraná R	0.997
CAB 0251 PL1	TC02617	-63.04	-9.91	Brazil	2	Marañón	0.993	Ji-Paraná R	0.918
CAB 0253 PL9	TC02618	-63.04	-9.91	Brazil	2	Marañón	0.996	Ji-Paraná R	0.994
CAB 0321 PL1	TC02619	-64.72	-3.32	Brazil	2	Iquitos	0.7	Middle Solimões R	0.992
CAB 0322 PL1	TC02620	-64.72	-3.32	Brazil	2	Iquitos	0.717	Middle Solimões R	0.995
CAB 0323 PL3	TC02621	-64.72	-3.32	Brazil	2	Iquitos	0.677	N/A	N/A
CAB 0324 PL4	TC02622	-64.72	-3.32	Brazil	2	Iquitos	0.529	N/A	N/A
CAB 0326 PL4	TC02623	-64.72	-3.32	Brazil	2	Iquitos	0.483	N/A	N/A
CAB 0327 PL3	TC02624	-64.72	-3.32	Brazil	2	Iquitos	0.684	N/A	N/A
CAB 0328 PL10	TC02625	-64.72	-3.32	Brazil	2	Iquitos	0.672	N/A	N/A
CAB 0329 PL4	TC02626	-64.72	-3.32	Brazil	2	Iquitos	0.709	Middle Solimões R	0.997
CAB 0330 PL9	TC02627	-64.72	-3.32	Brazil	2	Iquitos	0.674	N/A	N/A
CAB 0331 PL4	TC02628	-64.72	-3.32	Brazil	2	Iquitos	0.782	Middle Solimões R	0.995
CAB 0334 PL4	TC02629	-69.93	-4.25	Brazil	3	Purús	0.803	Upper Solimões R - Iça R	0.814
CAB 0335 PL6	TC02630	-69.93	-4.25	Brazil	2	Amelonado	0.557	N/A	N/A
CAB 0336 PL3	TC02631	-69.93	-4.25	Brazil	3	Purús	0.77	Upper Solimões R - Iça R	0.956
CAB 0339 PL1	TC02632	-69.93	-4.25	Brazil	3	Purús	0.831	Upper Solimões R - Iça R	0.97
CAB 0340 PL2	TC02633	-69.93	-4.25	Brazil	2	Purús	0.826	Upper Solimões R - Iça R	0.992
CAB 0341 PL2	TC02634	-69.93	-4.25	Brazil	3	Purús	0.819	Upper Solimões R - Iça R	0.985
CAB 0342 PL1	TC02635	-69.93	-4.25	Brazil	2	Purús	0.823	Upper Solimões R - Iça R	0.997
CAB 0343 PL3	TC02636	-69.93	-4.25	Brazil	3	Purús	0.83	Upper Solimões R - Iça R	0.95
CAB 0344 PL1	TC02637	-69.93	-4.25	Brazil	2	Purús	0.644	N/A	N/A
CAB 0345 PL2	TC02638	-69.93	-4.25	Brazil	2	Purús	0.622	N/A	N/A
CAB 0349 PL3	TC02639	-72	-4.83	Brazil	1	Iquitos	0.509	N/A	N/A
CAB 0352 PL1	TC02641	-72	-4.83	Brazil	1	Iquitos	0.698	IMC I	0.531
CAB 0353 PL2	TC02642	-72	-4.83	Brazil	1	Iquitos	0.509	N/A	N/A
CAB 0355 PL2	TC02644	-72	-4.83	Brazil	3	Purús	0.886	*	0.995
CAB 0356 PL2	TC02645	-72	-4.83	Brazil	2	Amelonado	0.529	N/A	N/A
CAB 0357 PL3	TC02646	-72	-4.83	Brazil	3	Purús	0.825	*	0.955
CAB 0359 PL3	TC02647	-69	-3	Brazil	1	Iquitos	0.543	N/A	N/A
CAB 0360 PL1	TC02648	-69	-3	Brazil	3	Purús	0.855	Upper Solimões R - Iça R	0.529
CAB 0362 PL5	TC02649	-69	-3	Brazil	3	Purús	0.884	Upper Solimões R - Iça R	0.521
CAB 0363 PL4	TC02650	-69	-3	Brazil	3	Purús	0.821	Upper Solimões R - Iça R	0.5
CAB 0364 PL2	TC02651	-69	-3	Brazil	2	Purús	0.814	Upper Solimões R - Iça R	0.811
CAB 0365 PL4	TC02652	-69	-3	Brazil	2	Purús	0.728	Upper Solimões R - Iça R	0.984
CAB 0366 PL1	TC02653	-69	-3	Brazil	2	Amelonado	0.511	N/A	N/A
CAB 0367 PL3	TC02654	-69	-3	Brazil	1	Iquitos	0.511	N/A	N/A
CAB 0368 PL1	TC02655	-69	-3	Brazil	2	Purús	0.784	Upper Solimões R - Iça R	0.975
CAB 0369 PL3	TC02656	-69	-3	Brazil	2	Purús	0.807	Upper Solimões R - Iça R	0.974
CAB 0422 PL2	TC02658	-61.83	-11	Brazil	2	Marañón	0.978	Ji-Paraná R	0.995
CAB 0440 PL1	TC02657	-61.83	-11	Brazil	2	Marañón	0.983	Ji-Paraná R	0.995
CAB 0445 PL2	TC02659	-61.83	-11	Brazil	2	Marañón	0.995	Ji-Paraná R	0.992
CAB 0448 PL1	TC02660	-61.83	-11	Brazil	2	Marañón	0.99	Ji-Paraná R	0.997
CAB 0450 PL1	TC02661	-61.83	-11	Brazil	2	Marañón	0.944	Ji-Paraná R	0.992
CAB 0452 PL3	TC02662	-61.83	-11	Brazil	2	Marañón	0.923	Ji-Paraná R	0.99
CAB 0458 PL1	TC02664	-61.83	-11	Brazil	2	Marañón	0.996	Ji-Paraná R	0.996
CAB 0459 PL1	TC02663	-61.83	-11	Brazil	2	Marañón	0.879	Ji-Paraná R	0.991
CAB 0466 PL3	TC02665	-61.83	-11	Brazil	2	Marañón	0.985	Ji-Paraná R	0.993
CAB 0467 PL3	TC02666	-61.83	-11	Brazil	2	Marañón	0.995	Ji-Paraná R	0.994
CAB 0475 PL3	TC02667	-68	-1.83	Brazil	2	Purús	0.605	N/A	N/A
CAB 0478 PL1	TC02668	-68	-1.83	Brazil	2	Amelonado	0.507	N/A	N/A
CAB 0481 PL2	TC02669	-68	-1.83	Brazil	2	Purús	0.612	N/A	N/A
CAB 0484 PL1	TC02670	-68	-1.83	Brazil	2	Purús	0.592	N/A	N/A
CAB 0487 PL2	TC02671	-68	-1.83	Brazil	2	Purús	0.701	*	0.987
CAB 0488 PL4	TC02672	-68	-1.83	Brazil	2	Purús	0.678	N/A	N/A
CAB 0493 PL3	TC02673	-68	-1.83	Brazil	2	Purús	0.659	N/A	N/A
CAB 0495 PL1	TC02675	-68	-1.83	Brazil	2	Purús	0.626	N/A	N/A
CAB 0496 PL2	TC02676	-68	-1.83	Brazil	2	Purús	0.465	N/A	N/A
CAB 0514 PL1	TC02677	-65	-3	Brazil	2	Purús	0.486	N/A	N/A
CAB 0516 PL3	TC02678	-65	-3	Brazil	2	Iquitos	0.527	N/A	N/A
CAB 0517 PL2	TC02679	-65	-3	Brazil	2	Iquitos	0.73	Middle Solimões R	0.996
CAB 0518 PL1	TC02680	-65	-3	Brazil	2	Iquitos	0.727	Middle Solimões R	0.998
CAB 0519 PL3	TC02681	-65	-3	Brazil	2	Iquitos	0.653	N/A	N/A
CAB 0521 PL2	TC02682	-65	-3	Brazil	2	Iquitos	0.697	Middle Solimões R	0.995
CAB 0527 PL1	TC02683	-65	-3	Brazil	2	Iquitos	0.657	N/A	N/A
CAB 0529 PL3	TC02684	-65	-3	Brazil	2	Iquitos	0.693	N/A	N/A
CAB 0531 PL2	TC02685	-65	-3	Brazil	2	Iquitos	0.453	N/A	N/A
CAB 0532 PL5	TC02686	-65	-3	Brazil	2	Iquitos	0.572	N/A	N/A
CAB 0728 PL3	TC02687	-59.33	-2	Brazil	2	Amelonado	0.992	Uatama R	0.998
CAB 0729 PL2	TC02688	-59.33	-2	Brazil	2	Amelonado	0.994	Uatama R	0.998
CAB 0730 PL1	TC02689	-59.33	-2	Brazil	2	Amelonado	0.993	Uatama R	0.998
CAB 0731 PL1	TC02690	-59.33	-2	Brazil	2	Amelonado	0.993	Uatama R	0.998
CAB 0732 PL1	TC02691	-59.33	-2	Brazil	2	Amelonado	0.994	Uatama R	0.998
CAB 0733 PL2	TC02692	-59.33	-2	Brazil	2	Amelonado	0.989	Uatama R	0.998
CAB 0734 PL1	TC02693	-59.33	-2	Brazil	2	Amelonado	0.993	Uatama R	0.998
CAB 0735 PL5	TC02694	-59.33	-2	Brazil	2	Amelonado	0.948	Uatama R	0.998
CAB 0745 PL2	TC02695	-61.45	-11.43	Brazil	2	Marañón	0.993	Ji-Paraná R	0.996
CAB 0749 PL1	TC02696	-61.45	-11.43	Brazil	2	Marañón	0.994	Ji-Paraná R	0.996
CAB 0754 PL1	TC02697	-61.45	-11.43	Brazil	2	Marañón	0.993	Ji-Paraná R	0.997
CAB 0756 PL1	TC02698	-61.45	-11.43	Brazil	2	Marañón	0.994	Ji-Paraná R	0.996
CAB 0757 PL1	TC02699	-61.45	-11.43	Brazil	2	Marañón	0.997	Ji-Paraná R	0.998
CAB 0758 PL1	TC02700	-61.45	-11.43	Brazil	2	Marañón	0.996	Ji-Paraná R	0.996
CAB 0763 PL1	TC02701	-61.45	-11.43	Brazil	2	Marañón	0.925	Ji-Paraná R	0.873
CAB 0764 PL2	TC02702	-61.45	-11.43	Brazil	2	Marañón	0.946	Ji-Paraná R	0.993
CAB 0771 PL3	TC02703	-61.45	-11.43	Brazil	2	Marañón	0.996	Ji-Paraná R	0.992
CAB 0772 PL1	TC02704	-61.45	-11.43	Brazil	2	Marañón	0.995	Ji-Paraná R	0.997
CAB 0775 PL1	TC02705	-61.83	-11	Brazil	2	Marañón	0.996	Ji-Paraná R	0.998
CAB 0776 PL1	TC02706	-61.83	-11	Brazil	2	Marañón	0.993	Ji-Paraná R	0.998
CAB 0777 PL2	TC02707	-61.83	-11	Brazil	2	Marañón	0.996	Ji-Paraná R	0.997
CAB 0779 PL1	TC02708	-61.83	-11	Brazil	2	Marañón	0.996	Ji-Paraná R	0.997
CAB 0782 PL1	TC02709	-61.83	-11	Brazil	2	Marañón	0.992	Ji-Paraná R	0.993
CAB 0783 PL1	TC02710	-61.83	-11	Brazil	2	Marañón	0.996	Ji-Paraná R	0.997
CC 267	TC01363	-83.29	10.07	Costa Rica	2	Amelonado	0.956	Amelonado Type III	0.756
CHA 5	TC03065	-91.1	16.94	Mexico	1	Criollo	0.997	Lacandona	0.986
CHA 13	TC03062	-91.1	16.94	Mexico	1	Criollo	0.998	Lacandona	0.926
CHA 18	TC03063	-91.1	16.94	Mexico	1	Criollo	0.997	Belize	0.782
CHA 20	TC03064	-91.1	16.94	Mexico	1	Criollo	0.998	Lacandona	0.984
CJ 2 PL4	TC02528	-52.3	-0.87	Brazil	2	Guiana	0.51	N/A	N/A
CJ 3 PL1	TC02529	-52.3	-0.87	Brazil	2	Amelonado	0.536	N/A	N/A
CJ 4 PL6	TC02530	-52.3	-0.87	Brazil	2	Guiana	0.543	N/A	N/A
CJ 5 PL7	TC02531	-52.3	-0.87	Brazil	2	Amelonado	0.502	N/A	N/A
CJ 6 PL1	TC02532	-52.3	-0.87	Brazil	2	Amelonado	0.533	N/A	N/A
CJ 8 PL3	TC02534	-52.3	-0.87	Brazil	2	Guiana	0.6	N/A	N/A
CJ 9 PL1	TC02535	-52.3	-0.87	Brazil	2	Amelonado	0.61	N/A	N/A
CJ 10 PL3	TC02536	-52.3	-0.87	Brazil	2	Amelonado	0.57	N/A	N/A
CJ 11 PL5	TC02537	-52.3	-0.87	Brazil	2	Amelonado	0.551	N/A	N/A
COC 2330	TC01148	-77	-0.92	Ecuador	1	Curaray	0.998	Coca R - Napo R	0.993
COC 3023	TC01143	-77	-0.92	Ecuador	1	Curaray	0.996	Coca R - Napo R	0.984
COC 3328	TC00383	-77	-0.92	Ecuador	1	Curaray	0.982	Coca R - Napo R	0.97
COC 3335	TC01147	-77	-0.92	Ecuador	1	Curaray	0.998	Coca R - Napo R	0.994
COC 3335	TC02956	-77	-0.92	Ecuador	1	Curaray	0.998	Coca R - Napo R	0.994
COC 3338	TC02957	-77	-0.92	Ecuador	1	Curaray	0.987	Coca R - Napo R	0.975
COCA 3370/5 [CHA]	TC04611	-77	-0.92	Ecuador	1	Iquitos	0.451	N/A	N/A
COL 2	TC03043	-73.96	11.32	Colombia	1	Criollo	0.997	Santa Marta	0.985
COL 3	TC03044	-73.96	11.32	Colombia	1	Criollo	0.998	Santa Marta	0.988
COL 4	TC03045	-73.96	11.32	Colombia	1	Criollo	0.998	Santa Marta	0.589
COL 5	TC03046	-73.96	11.32	Colombia	1	Criollo	0.998	Santa Marta	0.587
COL 8	TC03048	-73.96	11.32	Colombia	1	Criollo	0.998	Santa Marta	0.989
COL 10	TC03050	-73.96	11.32	Colombia	1	Criollo	0.998	Santa Marta	0.981
COL 11	TC03051	-73.96	11.32	Colombia	1	Criollo	0.998	Santa Marta	0.992
CRIOLLO 13	TC05419	-83.37	9.6	Costa Rica	1	Criollo	0.998	*	0.975
CUR 3	TC00382	-77	-1.33	Ecuador	2	Curaray	0.432	N/A	N/A
CUR 6	TC01519	-77	-1.33	Ecuador	1	Curaray	0.718	Curaray R - Napo R	0.65
CURIS	TC02958	Not availabe	Not availabe	Ecuador	1	Curaray	0.96	Coca R - Napo R	0.62
EBC 114	TC01503	-70.28	-0.92	Colombia	3	Purús	0.805	*	0.996
EBC 121	TC01506	-69.53	-1.28	Colombia	2	Purús	0.609	N/A	N/A
EBC 122	TC01450	-69.53	-1.28	Colombia	2	Purús	0.629	N/A	N/A
EBC 126	TC01091	-69.68	-1.28	Colombia	2	Nacional	0.406	N/A	N/A
EBC 136	TC01499	-69.72	-1.25	Colombia	2	Purús	0.744	*	0.621
EBC 138	TC01090	-69.43	-1.38	Colombia	2	Purús	0.659	N/A	N/A
EBC 142	TC01089	-69.45	-1.43	Colombia	2	Purús	0.441	N/A	N/A
EBC 148	TC01088	-69.43	-1.33	Colombia	2	Purús	0.549	N/A	N/A
EEG 29(CEPLAC)	TC00182	-39.4	-14.77	Brazil	2	Amelonado	0.997	Amelonado Type II	0.992
EEG 65(CEPLAC)	TC00183	-39.4	-14.77	Brazil	2	Amelonado	0.997	Amelonado Type II	0.976
ELP 5	TC02222	-52.98	2.32	French Guiana	2	Guiana	0.998	Camopi R-Euleupousing R	0.788
ELP 7 A	TC02197	-52.98	2.32	French Guiana	2	Guiana	0.998	Camopi R-Euleupousing R	0.992
ELP 9 A	TC02205	-52.98	2.32	French Guiana	2	Guiana	0.997	Camopi R-Euleupousing R	0.986
ELP 15	TC02225	-52.98	2.32	French Guiana	2	Guiana	0.997	Camopi R-Euleupousing R	0.986
ELP 16 A	TC02194	-52.98	2.32	French Guiana	2	Guiana	0.998	Camopi R-Euleupousing R	0.992
ELP 18 A	TC02206	-52.98	2.32	French Guiana	2	Guiana	0.997	Camopi R-Euleupousing R	0.988
ELP 20 A	TC02198	-52.98	2.32	French Guiana	2	Guiana	0.996	Camopi R-Euleupousing R	0.979
ELP 28 A	TC02202	-52.95	2.32	French Guiana	2	Guiana	0.613	N/A	N/A
ELP 32 A	TC02196	-52.95	2.3	French Guiana	2	Guiana	0.565	N/A	N/A
ELP 34 A	TC02200	-52.95	2.3	French Guiana	2	Amelonado	0.727	Amelonado Type III	0.964
ELP 35 A	TC02207	-52.95	2.3	French Guiana	2	Amelonado	0.509	N/A	N/A
ELP 37 A	TC02204	-52.95	2.3	French Guiana	2	Amelonado	0.517	N/A	N/A
FSC 1	TC00159	-39.4	-14.77	Brazil	2	Amelonado	0.996	Amelonado Type II	0.671
FSC 2	TC00160	-39.4	-14.77	Brazil	2	Amelonado	0.997	Amelonado Type II	0.652
FSC 3	TC00161	-39.4	-14.77	Brazil	2	Amelonado	0.997	Amelonado Type I	0.981
FSC 4	TC00162	-39.4	-14.77	Brazil	2	Amelonado	0.997	Amelonado Type I	0.777
FSC 5	TC00163	-39.4	-14.77	Brazil	2	Amelonado	0.997	Amelonado Type II	0.589
FSC 6	TC00164	-39.4	-14.77	Brazil	2	Amelonado	0.997	Amelonado Type I	0.971
FSC 7	TC00165	-39.4	-14.77	Brazil	2	Amelonado	0.986	Amelonado Type II	0.907
FSC 8	TC00166	-39.4	-14.77	Brazil	2	Amelonado	0.994	Amelonado Type II	0.995
FSC 9	TC00167	-39.4	-14.77	Brazil	2	Amelonado	0.997	Amelonado Type II	0.954
FSC 10	TC00168	-39.4	-14.77	Brazil	2	Amelonado	0.997	Amelonado Type I	0.995
FSC 11	TC00169	-39.4	-14.77	Brazil	2	Amelonado	0.997	Amelonado Type I	0.994
FSC 12	TC00170	-39.4	-14.77	Brazil	2	Amelonado	0.996	Amelonado Type II	0.683
FSC 13	TC00171	-39.4	-14.77	Brazil	2	Amelonado	0.997	Amelonado Type II	0.994
FSC 14	TC00172	-39.4	-14.77	Brazil	2	Amelonado	0.998	Amelonado Type II	0.969
FSC 15	TC00173	-39.4	-14.77	Brazil	2	Amelonado	0.997	Amelonado Type II	0.959
FSC 16	TC00174	-39.4	-14.77	Brazil	2	Amelonado	0.997	Amelonado Type II	0.992
GU 116A	TC02186	-53.42	2.33	French Guiana	2	Guiana	0.997	Camopi R-Euleupousing R	0.958
GU 124A	TC02172	-53.25	2.35	French Guiana	2	Guiana	0.995	Camopi R-Euleupousing R	0.989
GU 134B	TC02167	-53.23	2.35	French Guiana	2	Guiana	0.984	Camopi R-Euleupousing R	0.922
GU 138A	TC02187	-53.23	2.35	French Guiana	2	Guiana	0.996	Camopi R-Euleupousing R	0.989
GU 139A	TC02168	-53.23	2.35	French Guiana	2	Guiana	0.997	Camopi R-Euleupousing R	0.992
GU 143A	TC02188	-53.23	2.35	French Guiana	2	Guiana	0.997	Camopi R-Euleupousing R	0.77
GU 155A	TC02173	-53.22	2.35	French Guiana	2	Guiana	0.997	Camopi R-Euleupousing R	0.939
GU 156B	TC02184	-53.22	2.35	French Guiana	2	Guiana	0.995	Camopi R-Euleupousing R	0.856
GU 174A	TC02189	-53.18	2.35	French Guiana	2	Guiana	0.997	Camopi R	0.948
GU 199A	TC02191	-53.18	2.35	French Guiana	2	Guiana	0.998	Camopi R	0.981
GU 214A	TC02182	-53.2	2.35	French Guiana	2	Guiana	0.997	Camopi R	0.95
GU 216A	TC02183	-53.2	2.35	French Guiana	2	Guiana	0.998	Camopi R	0.938
GU 218A	TC02185	-53.2	2.35	French Guiana	2	Guiana	0.998	Camopi R	0.957
GU 227A	TC02178	-53.2	2.35	French Guiana	2	Guiana	0.997	Camopi R	0.98
GU 230A	TC02179	-53.2	2.35	French Guiana	2	Guiana	0.998	Camopi R	0.99
GU 254A	TC02169	-53.22	2.35	French Guiana	2	Guiana	0.998	Camopi R-Euleupousing R	0.991
GU 274A	TC02170	-53.22	2.35	French Guiana	2	Guiana	0.997	Camopi R-Euleupousing R	0.985
GU 285A	TC02171	-53.22	2.35	French Guiana	2	Guiana	0.996	Camopi R-Euleupousing R	0.986
GU 292A	TC02180	-53.2	2.35	French Guiana	2	Guiana	0.997	Camopi R-Euleupousing R	0.659
GU 295A	TC02192	-53.2	2.35	French Guiana	2	Guiana	0.998	Camopi R-Euleupousing R	0.509
GU 297B	TC02174	-53.18	2.35	French Guiana	2	Guiana	0.993	Camopi R	0.942
GU 308A	TC02175	-53.18	2.35	French Guiana	2	Guiana	0.997	Camopi R	0.967
GU 315A	TC02190	-53.18	2.35	French Guiana	2	Guiana	0.997	Camopi R-Euleupousing R	0.528
GU 323A	TC02176	-53.18	2.35	French Guiana	2	Guiana	0.997	Camopi R	0.99
GU 326A	TC02177	-53.18	2.35	French Guiana	2	Guiana	0.997	Camopi R	0.507
GU 331A	TC02181	-53.2	2.35	French Guiana	2	Guiana	0.994	Camopi R	0.548
IMC 2	TC00706	-73.2	-3.78	Peru	1	Iquitos	0.883	IMC II	0.725
IMC 3	TC00708	-73.2	-3.78	Peru	1	Iquitos	0.825	IMC II	0.988
IMC 5	TC00531	-73.2	-3.78	Peru	1	Iquitos	0.974	IMC I	0.983
IMC 6	TC00496	-73.2	-3.78	Peru	1	Iquitos	0.996	IMC I	0.995
IMC 9	TC05141	-73.2	-3.78	Peru	1	Iquitos	0.855	IMC II	0.882
IMC 10	TC00485	-73.2	-3.78	Peru	1	Iquitos	0.996	IMC I	0.998
IMC 11	TC00704	-73.2	-3.78	Peru	1	Iquitos	0.996	IMC I	0.997
IMC 12	TC00486	-73.2	-3.78	Peru	1	Iquitos	0.996	IMC I	0.996
IMC 13	TC00487	-73.2	-3.78	Peru	1	Iquitos	0.996	IMC I	0.997
IMC 16	TC00473	-73.2	-3.78	Peru	1	Iquitos	0.996	IMC I	0.995
IMC 18	TC00705	-73.2	-3.78	Peru	1	Iquitos	0.992	IMC I	0.997
IMC 20	TC00707	-73.2	-3.78	Peru	1	Iquitos	0.996	IMC I	0.997
IMC 23	TC00490	-73.2	-3.78	Peru	1	Iquitos	0.996	IMC I	0.996
IMC 27	TC00491	-73.2	-3.78	Peru	1	Iquitos	0.996	IMC I	0.996
IMC 30	TC00492	-73.2	-3.78	Peru	1	Iquitos	0.994	IMC I	0.99
IMC 31	TC00493	-73.2	-3.78	Peru	1	Iquitos	0.996	IMC I	0.994
IMC 33	TC00494	-73.2	-3.78	Peru	1	Iquitos	0.996	IMC I	0.998
IMC 36	TC00709	-73.2	-3.78	Peru	1	Iquitos	0.399	N/A	N/A
IMC 36	TC00527	-73.2	-3.78	Peru	1	Iquitos	0.996	IMC I	0.998
IMC 38	TC01183	-73.2	-3.78	Peru	1	Iquitos	0.994	IMC I	0.997
IMC 38	TC00495	-73.2	-3.78	Peru	1	Iquitos	0.993	IMC I	0.998
IMC 39	TC00710	-73.2	-3.78	Peru	1	Iquitos	0.995	IMC I	0.997
IMC 39	TC00471	-73.2	-3.78	Peru	1	Iquitos	0.996	IMC I	0.997
IMC 39	TC00528	-73.2	-3.78	Peru	1	Iquitos	0.996	IMC I	0.994
IMC 41	TC00467	-73.2	-3.78	Peru	1	Iquitos	0.914	IMC II	0.997
IMC 42	TC00885	-73.2	-3.78	Peru	1	Iquitos	0.995	IMC I	0.964
IMC 44	TC00558	-73.2	-3.78	Peru	1	Iquitos	0.996	IMC I	0.995
IMC 47	TC00886	-73.2	-3.78	Peru	1	Iquitos	0.991	IMC I	0.986
IMC 48	TC00530	-73.2	-3.78	Peru	1	Iquitos	0.994	IMC I	0.991
IMC 49	TC00887	-73.2	-3.78	Peru	1	Iquitos	0.904	IMC II	0.996
IMC 50	TC00560	-73.2	-3.78	Peru	1	Iquitos	0.992	IMC I	0.992
IMC 51	TC00753	-73.2	-3.78	Peru	1	Iquitos	0.806	IMC II	0.997
IMC 53	TC00888	-73.2	-3.78	Peru	1	Iquitos	0.989	IMC I	0.996
IMC 55	TC00890	-73.2	-3.78	Peru	1	Iquitos	0.996	IMC I	0.995
IMC 58	TC00562	-73.2	-3.78	Peru	1	Iquitos	0.996	IMC I	0.997
IMC 59	TC00563	-73.2	-3.78	Peru	1	Iquitos	0.996	IMC I	0.996
IMC 60	TC00754	-73.2	-3.78	Peru	1	Iquitos	0.996	IMC I	0.997
IMC 61	TC00755	-73.2	-3.78	Peru	1	Iquitos	0.793	IMC II	0.959
IMC 63	TC00484	-73.2	-3.78	Peru	1	Iquitos	0.994	IMC I	0.997
IMC 65	TC00892	-73.2	-3.78	Peru	1	Iquitos	0.995	IMC I	0.992
IMC 66	TC00893	-73.2	-3.78	Peru	1	Iquitos	0.915	IMC II	0.996
IMC 68	TC00564	-73.2	-3.78	Peru	1	Iquitos	0.996	IMC I	0.997
IMC 71	TC00534	-73.2	-3.78	Peru	1	Iquitos	0.996	IMC I	0.997
IMC 73	TC00565	-73.2	-3.78	Peru	1	Iquitos	0.836	IMC II	0.995
IMC 76	TC05149	-73.2	-3.78	Peru	1	Iquitos	0.996	IMC I	0.99
IMC 77	TC00895	-73.2	-3.78	Peru	1	Iquitos	0.996	IMC I	0.998
IMC 78	TC00566	-73.2	-3.78	Peru	1	Iquitos	0.996	IMC I	0.995
IMC 83	TC00535	-73.2	-3.78	Peru	1	Iquitos	0.996	IMC I	0.995
IMC 85	TC00567	-73.2	-3.78	Peru	1	Iquitos	0.996	IMC I	0.997
IMC 94	TC00498	-73.2	-3.78	Peru	1	Iquitos	0.974	IMC II	0.923
IMC 96	TC00568	-73.2	-3.78	Peru	1	Iquitos	0.996	IMC I	0.992
IMC 98	TC00759	-73.2	-3.78	Peru	1	Iquitos	0.996	IMC I	0.997
IMC 103	TC00554	-73.2	-3.78	Peru	1	Iquitos	0.913	IMC II	0.979
IMC 104	TC00703	-73.2	-3.78	Peru	1	Iquitos	0.766	IMC II	0.997
IMC 105	TC00555	-73.2	-3.78	Peru	1	Iquitos	0.837	IMC II	0.979
IMC 107	TC00556	-73.2	-3.78	Peru	1	Iquitos	0.996	IMC I	0.997
KER 1 L	TC02227	-53	2.17	French Guiana	2	Guiana	0.829	Kérindioutou R	0.544
KER 3	TC02220	-52.98	2.17	French Guiana	2	Guiana	0.997	Kérindioutou R	0.996
KER 5	TC02219	-52.97	2.17	French Guiana	2	Guiana	0.973	Kérindioutou R	0.966
KER 6	TC02218	-52.83	2.17	French Guiana	2	Guiana	0.665	N/A	N/A
KER 7	TC02217	-52.95	2.17	French Guiana	2	Guiana	0.998	Kérindioutou R	0.996
KER 8 L	TC02231	-52.95	2.17	French Guiana	2	Guiana	0.997	Kérindioutou R	0.996
KER 9	TC02216	-52.95	2.17	French Guiana	2	Guiana	0.996	Kérindioutou R	0.992
KER 11 1 L	TC02229	-52.93	2.18	French Guiana	2	Guiana	0.994	Kérindioutou R	0.989
KER 11 2 L	TC02232	-52.93	2.18	French Guiana	2	Guiana	0.997	Kérindioutou R	0.996
KER 11 3 L	TC02230	-52.93	2.18	French Guiana	2	Guiana	0.997	Kérindioutou R	0.993
KER 11 4 L	TC02228	-52.93	2.18	French Guiana	2	Guiana	0.997	Kérindioutou R	0.922
KER 2L	TC02233	-53	2.17	French Guiana	2	Guiana	0.997	Kérindioutou R	0.996
LaGloria 1 1	TC02473	-79.81	-0.71	Ecuador	2	Nacional	0.998	Nacional	0.998
LaGloria 3 3	TC02474	-79.81	-0.71	Ecuador	2	Nacional	0.998	Nacional	0.998
LaGloria 12 12	TC02475	-79.81	-0.71	Ecuador	2	Nacional	0.998	Nacional	0.998
LaGloria 14 14	TC02476	-79.81	-0.71	Ecuador	2	Nacional	0.998	Nacional	0.998
LaGloria 16 16	TC02477	-79.81	-0.71	Ecuador	2	Nacional	0.998	Nacional	0.998
LaGloria 17 17	TC02478	-79.81	-0.71	Ecuador	2	Nacional	0.998	Nacional	0.998
LaGloria 19 19	TC02479	-79.81	-0.71	Ecuador	2	Nacional	0.998	Nacional	0.998
LaGloria 20 20	TC02480	-79.81	-0.71	Ecuador	2	Nacional	0.998	Nacional	0.998
LaGloria 24 24	TC02481	-79.81	-0.71	Ecuador	2	Nacional	0.998	Nacional	0.998
LaGloria 25 25	TC02482	-79.81	-0.71	Ecuador	2	Nacional	0.998	Nacional	0.998
LAN 21	TC03052	-91.1	16.94	Mexico	1	Criollo	0.998	Lacadona	0.932
LAN 22	TC03053	-91.1	16.94	Mexico	1	Criollo	0.998	Lacadona	0.968
LAN 23	TC03054	-91.1	16.94	Mexico	1	Criollo	0.994	Lacadona	0.719
LAN 26	TC03055	-91.1	16.94	Mexico	1	Criollo	0.995	Lacadona	0.915
LAN 27	TC03056	-91.1	16.94	Mexico	1	Criollo	0.998	Lacadona	0.985
LAN 28	TC03057	-91.1	16.94	Mexico	1	Criollo	0.998	Lacadona	0.991
LAN 29	TC03058	-91.1	16.94	Mexico	1	Criollo	0.998	Lacadona	0.99
LAN 30	TC03059	-91.1	16.94	Mexico	1	Criollo	0.998	Lacadona	0.992
LasBrisas 4 4	TC02483	-79.81	-0.71	Ecuador	2	Nacional	0.998	Nacional	0.998
LasBrisas 5 5	TC02484	-79.81	-0.71	Ecuador	2	Nacional	0.998	Nacional	0.998
LasBrisas 9 9	TC02485	-79.81	-0.71	Ecuador	2	Nacional	0.998	Nacional	0.998
LasBrisas 13 13	TC02491	-79.81	-0.71	Ecuador	2	Nacional	0.998	Nacional	0.998
LasBrisas 16 16	TC02488	-79.81	-0.71	Ecuador	2	Nacional	0.967	Nacional	0.888
LasBrisas 17 17	TC02490	-79.81	-0.71	Ecuador	2	Nacional	0.996	Nacional	0.997
LasBrisas 18 18	TC02486	-79.81	-0.71	Ecuador	2	Nacional	0.995	Nacional	0.997
LasBrisas 27 27	TC02492	-79.81	-0.71	Ecuador	2	Nacional	0.998	Nacional	0.997
LasBrisas 29 29	TC02489	-79.81	-0.71	Ecuador	2	Nacional	0.998	Nacional	0.997
LasBrisas 30 30	TC02487	-79.81	-0.71	Ecuador	2	Nacional	0.998	Nacional	0.998
LCTEEN 2	TC01510	-76.85	-0.37	Ecuador	1	Curaray	0.996	Coca R - Napo R	0.924
LCTEEN 23	TC01479	-76.63	-0.4	Ecuador	1	Curaray	0.785	Curaray R - Napo R	0.991
LCTEEN 26	TC01131	-76.63	-0.4	Ecuador	2	Amelonado	0.352	N/A	N/A
LCTEEN 30	TC01475	-76.57	-0.4	Ecuador	1	Curaray	0.798	Curaray R - Napo R	0.98
LCTEEN 31	TC01489	-76.57	-0.4	Ecuador	1	Curaray	0.762	Curaray R - Napo R	0.99
LCTEEN 32	TC01487	-76.57	-0.4	Ecuador	1	Curaray	0.792	Curaray R - Napo R	0.991
LCTEEN 33	TC01444	-76.57	-0.4	Ecuador	1	Curaray	0.832	Curaray R - Napo R	0.954
LCTEEN 36	TC01440	-76.57	-0.4	Ecuador	1	Curaray	0.696	Curaray R - Napo R	0.984
LCTEEN 37	TC01449	-76.57	-0.4	Ecuador	1	Curaray	0.626	N/A	N/A
LCTEEN 38	TC01498	-76.34	-0.24	Ecuador	1	Curaray	0.679	N/A	N/A
LCTEEN 46	TC01130	-77.33	-0.7	Ecuador	4	Nacional	0.429	N/A	N/A
LCTEEN 46	TC01431	-77.33	-0.7	Ecuador	2	Nacional	0.445	N/A	N/A
LCTEEN 47	TC01434	-77.33	-0.7	Ecuador	1	Curaray	0.988	Coca R - Napo R	0.851
LCTEEN 49	TC01466	-77.33	-0.7	Ecuador	1	Curaray	0.995	Coca R - Napo R	0.917
LCTEEN 52	TC01435	-77.33	-0.7	Ecuador	1	Curaray	0.989	Coca R - Napo R	0.903
LCTEEN 57	TC01125	-77.33	-0.7	Ecuador	2	Iquitos	0.255	N/A	N/A
LCTEEN 57	TC01468	-77.33	-0.7	Ecuador	1	Curaray	0.992	Coca R - Napo R	0.823
LCTEEN 60	TC01433	-78	-1.58	Ecuador	1	Curaray	0.535	N/A	N/A
LCTEEN 63	TC01446	-76.9	0.25	Ecuador	1	Curaray	0.998	Coca R - Napo R	0.991
LCTEEN 65	TC01469	-76.9	0.25	Ecuador	1	Curaray	0.998	Coca R - Napo R	0.989
LCTEEN 73	TC01127	-78.67	-3.95	Ecuador	1	Iquitos	0.516	N/A	N/A
LCTEEN 73	TC01455	-78.67	-3.95	Ecuador	2	Nacional	0.776	*	0.744
LCTEEN 74	TC01458	-78.67	-3.95	Ecuador	2	Nacional	0.705	*	0.865
LCTEEN 80	TC01488	-78.45	-3.62	Ecuador	1	Curaray	0.604	N/A	N/A
LCTEEN 81	TC01460	-78.45	-3.62	Ecuador	2	Nacional	0.604	N/A	N/A
LCTEEN 87	TC01095	-78.85	-3.9	Ecuador	1	Curaray	0.989	Upano R	0.973
LCTEEN 91	TC01480	-78.63	-3.8	Ecuador	2	Nacional	0.937	*	0.583
LCTEEN 94	TC01133	-76.92	-1.33	Ecuador	1	Curaray	0.547	N/A	N/A
LCTEEN 107	TC01452	-76.92	-1.33	Ecuador	1	Curaray	0.653	N/A	N/A
LCTEEN 108	TC01456	-76.92	-1.33	Ecuador	1	Curaray	0.693	N/A	N/A
LCTEEN 120	TC01465	-77.08	-2.08	Ecuador	1	Curaray	0.881	Coca R - Napo R	0.538
LCTEEN 121	TC01112	-77.08	-2.08	Ecuador	1	Curaray	0.739	Curaray R - Napo R	0.656
LCTEEN 121	TC01454	-77.08	-2.08	Ecuador	1	Curaray	0.872	Bobonaza R	0.947
LCTEEN 122	TC01473	-77.08	-2.08	Ecuador	1	Curaray	0.874	Bobonaza R	0.985
LCTEEN 123	TC01484	-77.08	-2.08	Ecuador	1	Curaray	0.892	Bobonaza R	0.953
LCTEEN 124	TC01461	-77.08	-2.08	Ecuador	1	Curaray	0.942	Bobonaza R	0.968
LCTEEN 125	TC01101	-77.08	-2.08	Ecuador	1	Curaray	0.921	Bobonaza R	0.938
LCTEEN 133	TC01462	-76.87	-0.37	Ecuador	1	Curaray	0.987	Coca R - Napo R	0.835
LCTEEN 134	TC01123	-76.87	-0.37	Ecuador	2	Curaray	0.481	N/A	N/A
LCTEEN 137	TC01463	-76.87	-0.37	Ecuador	1	Curaray	0.998	Coca R - Napo R	0.994
LCTEEN 141	TC01453	-76.87	-0.37	Ecuador	1	Curaray	0.998	Coca R - Napo R	0.989
LCTEEN 142	TC01464	-76.87	-0.37	Ecuador	1	Curaray	0.899	Coca R - Napo R	0.728
LCTEEN 144	TC01474	-76.87	-0.37	Ecuador	1	Curaray	0.996	Coca R - Napo R	0.992
LCTEEN 146	TC01119	-76.87	-0.37	Ecuador	3	Amelonado	0.433	N/A	N/A
LCTEEN 151	TC01451	-76.87	-0.37	Ecuador	1	Curaray	0.558	N/A	N/A
LCTEEN 152	TC01459	-76.87	-0.37	Ecuador	1	Curaray	0.561	N/A	N/A
LCTEEN 154	TC01094	-76.42	-0.5	Ecuador	1	Curaray	0.716	Curaray R - Napo R	0.989
LCTEEN 156	TC01103	-76.42	-0.5	Ecuador	1	Curaray	0.873	Curaray R - Napo R	0.959
LCTEEN 180	TC01105	-75.53	-0.83	Ecuador	1	Curaray	0.794	Curaray R - Napo R	0.735
LCTEEN 188	TC01443	-75.67	0.05	Ecuador	2	Curaray	0.461	N/A	N/A
LCTEEN 189	TC01481	-75.42	-0.05	Ecuador	2	Curaray	0.455	N/A	N/A
LCTEEN 193	TC01471	-75.42	-0.05	Ecuador	2	Curaray	0.477	N/A	N/A
LCTEEN 195	TC01126	-75.93	0.2	Ecuador	2	Curaray	0.432	N/A	N/A
LCTEEN 195	TC01477	-75.96	0.22	Colombia	1	Curaray	0.465	N/A	N/A
LCTEEN 219	TC01114	-77.45	-1.5	Ecuador	1	Curaray	0.997	Coca R - Napo R	0.903
LCTEEN 223	TC01097	-77.45	-1.5	Ecuador	1	Curaray	0.998	Coca R - Napo R	0.89
LCTEEN 227	TC01100	-77.45	-1.5	Ecuador	1	Curaray	0.349	N/A	N/A
LCTEEN 232	TC01102	-77.45	-1.5	Ecuador	1	Curaray	0.997	Coca R - Napo R	0.805
LCTEEN 234	TC01118	-77.45	-1.5	Ecuador	1	Curaray	0.996	Coca R - Napo R	0.948
LCTEEN 237	TC01104	-77.45	-1.5	Ecuador	1	Curaray	0.995	Coca R - Napo R	0.977
LCTEEN 241	TC04636	-77.45	-1.5	Ecuador	1	Curaray	0.754	Upano R	0.431
LCTEEN 249	TC01107	-76.67	-1.42	Ecuador	1	Curaray	0.631	N/A	N/A
LCTEEN 250	TC01121	-76.67	-1.42	Ecuador	1	Contamana	0.28	N/A	N/A
LCTEEN 253	TC01129	-76.67	-1.42	Ecuador	1	Curaray	0.688	N/A	N/A
LCTEEN 254	TC01110	-76.58	-1.42	Ecuador	1	Curaray	0.812	Curaray R - Napo R	0.523
LCTEEN 255	TC01113	-76.58	-1.42	Ecuador	1	Curaray	0.718	Curaray R - Napo R	0.821
LCTEEN 257	TC01116	-76.58	-1.5	Ecuador	1	Curaray	0.813	Curaray R - Napo R	0.611
LCTEEN 258	TC01128	-76.58	-1.53	Ecuador	1	Curaray	0.741	Curaray R - Napo R	0.655
LCTEEN 259	TC01439	-76.58	-1.58	Ecuador	1	Curaray	0.732	Curaray R - Napo R	0.739
LCTEEN 264	TC01445	-76.2	-1.6	Ecuador	1	Curaray	0.8	Curaray R - Napo R	0.68
LCTEEN 278	TC01096	-76.05	-1.6	Ecuador	1	Iquitos	0.385	N/A	N/A
LCTEEN 278	TC01485	-76.05	-1.6	Ecuador	1	Curaray	0.736	Curaray R - Napo R	0.659
LCTEEN 281	TC01482	-76.05	-1.6	Ecuador	1	Curaray	0.849	Bobonaza R	0.455
LCTEEN 300	TC01457	-78.17	-2.53	Ecuador	1	Curaray	0.992	Upano R	0.987
LCTEEN 302	TC05159	-78.17	-2.53	Ecuador	3	Amelonado	0.471	N/A	N/A
LCTEEN 312	TC01124	-78.17	-2.5	Ecuador	2	Nacional	0.269	N/A	N/A
LCTEEN 312	TC01478	-78.17	-2.5	Ecuador	1	Curaray	0.996	Upano R	0.985
LCTEEN 325	TC01111	-77.75	-1.05	Ecuador	1	Curaray	0.668	N/A	N/A
LCTEEN 326	TC01093	-77.75	-1.05	Ecuador	3	Iquitos	0.356	N/A	N/A
LCTEEN 327	TC01437	-77.03	0.28	Ecuador	1	Curaray	0.989	Coca R - Napo R	0.986
LCTEEN 329	TC01106	-78.42	-2.88	Ecuador	1	Curaray	0.739	Upano R	0.933
LCTEEN 333	TC01432	-78.17	-2.52	Ecuador	1	Curaray	0.991	Upano R	0.979
LCTEEN 334	TC01120	-78.17	-2.52	Ecuador	1	Curaray	0.995	Upano R	0.967
LCTEEN 347	TC01098	-78.17	-2.52	Ecuador	1	Curaray	0.972	Upano R	0.986
LCTEEN 362	TC01504	-76.2	-2.2	Ecuador	3	Purús	0.606	N/A	N/A
LCTEEN 364	TC01441	-76.2	-2.2	Ecuador	3	Purús	0.474	N/A	N/A
LCTEEN 366	TC01447	-76.2	-2.2	Ecuador	3	Purús	0.605	N/A	N/A
LCTEEN 367	TC01467	-76.2	-2.2	Ecuador	3	Purús	0.622	N/A	N/A
LCTEEN 368	TC01438	-76.2	-2.2	Ecuador	3	Purús	0.549	N/A	N/A
LCTEEN 369	TC01483	-76.2	-2.2	Ecuador	3	Purús	0.441	N/A	N/A
LCTEEN 370	TC01492	-76.2	-2.2	Ecuador	3	Purús	0.613	N/A	N/A
LCTEEN 371	TC01500	-76.12	-2.12	Ecuador	3	Purús	0.492	N/A	N/A
LCTEEN 373	TC01495	-76.75	-0.5	Ecuador	1	Curaray	0.859	Curaray R - Napo R	0.558
LCTEEN 374	TC01472	-76.87	-0.17	Ecuador	1	Curaray	0.997	Coca R - Napo R	0.821
LCTEEN 376	TC01512	-77.3	-0.5	Ecuador	1	Curaray	0.996	Coca R - Napo R	0.754
LCTEEN 386	TC01514	-77.52	-2.42	Ecuador	1	Curaray	0.997	Upano R	0.505
LCTEEN 389	TC01520	-77.52	-2.42	Ecuador	1	Curaray	0.993	Upano R	0.38
LCTEEN 390	TC01523	-77.52	-2.42	Ecuador	1	Curaray	0.996	Upano R	0.483
LCTEEN 395	TC01493	-76.75	-0.42	Ecuador	1	Curaray	0.706	Curaray R - Napo R	0.99
LCTEEN 399	TC01517	-76.75	-0.42	Ecuador	1	Curaray	0.761	Curaray R - Napo R	0.959
LCTEEN 401	TC01516	-75.52	-0.83	Ecuador	2	Curaray	0.473	N/A	N/A
LCTEEN 403	TC01509	-75.75	-0.95	Ecuador	2	Curaray	0.418	N/A	N/A
LCTEEN 406	TC01511	-75.75	-0.95	Ecuador	4	Purús	0.386	N/A	N/A
LCTEEN 408	TC01490	-75.42	-0.92	Ecuador	4	Purús	0.39	N/A	N/A
LCTEEN 409	TC01501	-75.42	-0.92	Ecuador	4	Purús	0.382	N/A	N/A
LCTEEN 411	TC01496	-75.25	-0.92	Ecuador	3	Purús	0.49	N/A	N/A
LCTEEN 412	TC01494	-75.25	-0.92	Ecuador	4	Purús	0.408	N/A	N/A
LCTEEN 413	TC01508	-75.25	-0.92	Ecuador	4	Purús	0.39	N/A	N/A
LCTEEN 414	TC01513	-75.25	-0.92	Ecuador	3	Purús	0.597	N/A	N/A
LCTEEN 415	TC01505	-75.25	-0.92	Ecuador	4	Purús	0.41	N/A	N/A
LCTEEN 421	TC01436	-77.92	-3.03	Ecuador	1	Curaray	0.995	Upano R	0.992
LCTEEN 427	TC01507	-77.92	-2.95	Ecuador	1	Curaray	0.856	Upano R	0.917
LCTEEN 429	TC01491	-77.92	-2.95	Ecuador	1	Curaray	0.842	Upano R	0.797
LCTEEN 432	TC01497	-78.12	-3.2	Ecuador	1	Curaray	0.964	Upano R	0.993
LCTEEN 434	TC01502	-78.12	-3.2	Ecuador	1	Curaray	0.977	Upano R	0.989
LCTEEN 162/S 1010	TC04632	-77.08	-0.42	Ecuador	1	Iquitos	0.541	N/A	N/A
LCTEEN 163/A	TC04634	-77.08	-0.42	Ecuador	1	Curaray	0.947	Coca R - Napo R	0.563
LCTEEN 261/S 4	TC04637	-76.33	-1.58	Ecuador	1	Curaray	0.993	Upano R	0.865
LIB 1	TC03069	-86.36	11.74	Nicaragua	1	Criollo	0.998	Belize	0.934
LIB 2	TC03070	-86.36	11.74	Nicaragua	1	Criollo	0.995	Belize	0.96
MA 11 PL2	TC02505	-60	-3	Brazil	3	Amelonado	0.499	N/A	N/A
MA 12 PL3	TC02504	-60	-3	Brazil	2	Amelonado	0.465	N/A	N/A
MA 13 PL9	TC02503	-60	-3	Brazil	3	Amelonado	0.563	N/A	N/A
MA 14 PL9	TC02502	-60	-3	Brazil	2	Amelonado	0.333	N/A	N/A
MA 15 PL21	TC02506	-60	-3	Brazil	3	Amelonado	0.351	N/A	N/A
MO 14	TC00999	-77.17	-3.75	Peru	2	Nacional	0.995	Morona	0.996
MO 20	TC00997	-77.17	-3.75	Peru	2	Nacional	0.983	Morona	0.919
MO 76	TC00998	-77.17	-3.75	Peru	2	Nacional	0.917	*	0.709
MO 80	TC00996	-77.17	-3.75	Peru	2	Nacional	0.991	Morona	0.844
MO 84	TC02722	-77.17	-3.75	Peru	2	Nacional	0.925	Morona	0.686
MO 90	TC00993	-77.17	-3.75	Peru	2	Nacional	0.996	Morona	0.995
MO 94	TC00990	-77.17	-3.75	Peru	2	Nacional	0.989	*	0.803
MO 96	TC00989	-77.17	-3.75	Peru	2	Nacional	0.992	Morona	0.993
MO 99	TC00987	-77.17	-3.75	Peru	2	Nacional	0.995	Morona	0.996
MO 118	TC00988	-77.17	-3.75	Peru	2	Nacional	0.996	Morona	0.995
MO 121	TC00992	-77.17	-3.75	Peru	2	Nacional	0.971	Morona	0.995
MO 122	TC00991	-77.17	-3.75	Peru	2	Nacional	0.961	*	0.547
MO 125	TC01003	-77.17	-3.75	Peru	2	Nacional	0.991	Morona	0.991
NA 1	TC00569	-73.35	-3.78	Peru	1	Nanay	0.571	N/A	N/A
NA 3	TC00589	-73.35	-3.78	Peru	1	Nanay	0.602	N/A	N/A
NA 8	TC00648	-73.35	-3.78	Peru	1	Nanay	0.585	N/A	N/A
NA 12	TC00572	-73.35	-3.78	Peru	1	Nanay	0.57	N/A	N/A
NA 13	TC00573	-73.35	-3.78	Peru	1	Nanay	0.583	N/A	N/A
NA 14	TC00575	-73.35	-3.78	Peru	1	Nanay	0.573	N/A	N/A
NA 16	TC00582	-73.35	-3.78	Peru	1	Nanay	0.624	N/A	N/A
NA 26	TC00914	-73.35	-3.78	Peru	1	Nanay	0.552	N/A	N/A
NA 30	TC00919	-73.35	-3.78	Peru	1	Nanay	0.998	Nanay III	0.994
NA 32	TC00794	-73.35	-3.78	Peru	2	Iquitos	0.507	N/A	N/A
NA 33	TC00797	-73.35	-3.78	Peru	1	Nanay	0.617	N/A	N/A
NA 34	TC00800	-73.35	-3.78	Peru	2	Iquitos	0.52	N/A	N/A
NA 35	TC00802	-73.35	-3.78	Peru	1	Nanay	0.785	*	0.518
NA 39	TC00924	-73.35	-3.78	Peru	1	Iquitos	0.485	N/A	N/A
NA 40	TC00597	-73.35	-3.78	Peru	1	Nanay	0.998	Nanay III	0.63
NA 43	TC00806	-73.35	-3.78	Peru	1	Nanay	0.96	Nanay III	0.766
NA 45	TC00602	-73.35	-3.78	Peru	1	Nanay	0.951	Nanay III	0.497
NA 46	TC00925	-73.35	-3.78	Peru	1	Nanay	0.959	Nanay III	0.495
NA 47	TC00807	-73.35	-3.78	Peru	1	Contamana	0.817	Nanay VII	0.999
NA 58	TC00813	-73.35	-3.78	Peru	1	Nanay	0.777	*	0.956
NA 61	TC00928	-73.35	-3.78	Peru	1	Nanay	0.554	N/A	N/A
NA 62	TC00606	-73.35	-3.78	Peru	1	Nanay	0.578	N/A	N/A
NA 66	TC00814	-73.35	-3.78	Peru	1	Nanay	0.569	N/A	N/A
NA 68	TC00929	-73.35	-3.78	Peru	1	Iquitos	0.638	N/A	N/A
NA 69	TC00616	-73.35	-3.78	Peru	1	Contamana	0.76	Nanay VII	0.998
NA 70	TC00624	-73.35	-3.78	Peru	1	Nanay	0.664	N/A	N/A
NA 74	TC00640	-73.35	-3.78	Peru	1	Nanay	0.764	Nanay II	0.966
NA 79	TC00934	-73.35	-3.78	Peru	1	Nanay	0.754	Nanay II	0.588
NA 84	TC00942	-73.35	-3.78	Peru	1	Nanay	0.992	Nanay I	0.542
NA 87	TC00829	-73.35	-3.78	Peru	1	Nanay	0.554	N/A	N/A
NA 90	TC00655	-73.35	-3.78	Peru	1	Nanay	0.997	Nanay I	0.506
NA 92	TC00657	-73.35	-3.78	Peru	1	Nanay	0.977	Nanay III	0.959
NA 95	TC00947	-73.35	-3.78	Peru	1	Nanay	0.76	Nanay II	0.572
NA 98	TC00831	-73.35	-3.78	Peru	1	Nanay	0.842	*	0.652
NA 106	TC00570	-73.35	-3.78	Peru	1	Nanay	0.998	Nanay I	0.625
NA 110	TC00897	-73.35	-3.78	Peru	1	Nanay	0.608	N/A	N/A
NA 111	TC00571	-73.35	-3.78	Peru	1	Nanay	0.604	N/A	N/A
NA 118	TC00769	-73.35	-3.78	Peru	1	Nanay	0.998	Nanay III	0.992
NA 127	TC00898	-73.35	-3.78	Peru	1	Nanay	0.998	Nanay III	0.992
NA 129	TC00770	-73.35	-3.78	Peru	1	Nanay	0.998	Nanay I	0.992
NA 141	TC00771	-73.35	-3.78	Peru	1	Nanay	0.755	Nanay II	0.989
NA 149	TC00901	-73.35	-3.78	Peru	1	Nanay	0.882	*	0.555
NA 154	TC00578	-73.35	-3.78	Peru	1	Nanay	0.913	Nanay III	0.545
NA 155	TC00902	-73.35	-3.78	Peru	1	Nanay	0.846	*	0.589
NA 156	TC00579	-73.35	-3.78	Peru	1	Nanay	0.996	Nanay III	0.989
NA 157	TC00580	-73.35	-3.78	Peru	1	Nanay	0.997	Nanay I	0.51
NA 168	TC00903	-73.35	-3.78	Peru	1	Nanay	0.807	*	0.485
NA 170	TC00904	-73.35	-3.78	Peru	1	Nanay	0.521	N/A	N/A
NA 178	TC00905	-73.35	-3.78	Peru	1	Nanay	0.998	Nanay I	0.992
NA 181	TC00774	-73.35	-3.78	Peru	1	Nanay	0.728	*	0.991
NA 183	TC00775	-73.35	-3.78	Peru	1	Nanay	0.786	*	0.983
NA 184	TC00583	-73.35	-3.78	Peru	1	Nanay	0.998	Nanay I	0.992
NA 186	TC00776	-73.35	-3.78	Peru	1	Nanay	0.997	Nanay I	0.588
NA 187	TC00906	-73.35	-3.78	Peru	1	Nanay	0.738	Nanay II	0.989
NA 189	TC00777	-73.35	-3.78	Peru	1	Nanay	0.766	Nanay II	0.991
NA 191	TC00779	-73.35	-3.78	Peru	1	Nanay	0.981	Nanay III	0.536
NA 194	TC00907	-73.35	-3.78	Peru	1	Nanay	0.998	Nanay III	0.994
NA 204	TC00908	-73.35	-3.78	Peru	1	Nanay	0.997	Nanay I	0.994
NA 206	TC00780	-73.35	-3.78	Peru	1	Nanay	0.636	N/A	N/A
NA 217	TC00910	-73.35	-3.78	Peru	1	Nanay	0.998	Nanay I	0.991
NA 226	TC00781	-73.35	-3.78	Peru	1	Nanay	0.787	Nanay II	0.501
NA 227	TC00782	-73.35	-3.78	Peru	1	Nanay	0.67	N/A	N/A
NA 228	TC05127	-73.35	-3.78	Peru	1	Nanay	0.997	Nanay I	0.97
NA 229	TC00911	-73.35	-3.78	Peru	1	Nanay	0.574	N/A	N/A
NA 232	TC00785	-73.35	-3.78	Peru	1	Nanay	0.998	Nanay I	0.658
NA 235	TC00786	-73.35	-3.78	Peru	1	Nanay	0.789	Nanay II	0.987
NA 241	TC00787	-73.35	-3.78	Peru	1	Nanay	0.814	Nanay II	0.954
NA 244	TC00538	-73.35	-3.78	Peru	1	Nanay	0.775	Nanay II	0.955
NA 246	TC00585	-73.35	-3.78	Peru	1	Nanay	0.805	*	0.661
NA 249	TC00453	-73.35	-3.78	Peru	1	Nanay	0.998	Nanay III	0.989
NA 251	TC00586	-73.35	-3.78	Peru	1	Contamana	0.853	Nanay VII	0.998
NA 254	TC00587	-73.35	-3.78	Peru	1	Nanay	0.997	Nanay I	0.975
NA 256	TC00912	-73.35	-3.78	Peru	2	Iquitos	0.644	N/A	N/A
NA 258	TC00913	-73.35	-3.78	Peru	1	Nanay	0.603	N/A	N/A
NA 268	TC00915	-73.35	-3.78	Peru	2	Iquitos	0.43	N/A	N/A
NA 279	TC00788	-73.35	-3.78	Peru	1	Nanay	0.997	Nanay III	0.843
NA 280	TC00918	-73.35	-3.78	Peru	1	Nanay	0.998	Nanay I	0.993
NA 283	TC00789	-73.35	-3.78	Peru	1	Nanay	0.998	Nanay I	0.95
NA 286	TC00790	-73.35	-3.78	Peru	1	Nanay	0.998	Nanay I	0.52
NA 289	TC00791	-73.35	-3.78	Peru	1	Nanay	0.998	Nanay I	0.991
NA 311	TC00793	-73.35	-3.78	Peru	1	Nanay	0.998	Nanay III	0.97
NA 322	TC00920	-73.35	-3.78	Peru	1	Nanay	0.998	Nanay I	0.991
NA 326	TC00921	-73.35	-3.78	Peru	1	Nanay	0.998	Nanay III	0.587
NA 327	TC00922	-73.35	-3.78	Peru	1	Nanay	0.868	Nanay I	0.559
NA 329	TC00796	-73.35	-3.78	Peru	1	Nanay	0.998	Nanay I	0.994
NA 331	TC00923	-73.35	-3.78	Peru	1	Nanay	0.998	Nanay I	0.992
NA 335	TC00798	-73.35	-3.78	Peru	1	Nanay	0.998	Nanay III	0.963
NA 337	TC00591	-73.35	-3.78	Peru	1	Nanay	0.819	Nanay II	0.656
NA 342	TC00801	-73.35	-3.78	Peru	1	Nanay	0.993	Nanay III	0.572
NA 359	TC00803	-73.35	-3.78	Peru	1	Nanay	0.982	Nanay III	0.515
NA 370	TC00592	-73.35	-3.78	Peru	1	Nanay	0.993	Nanay III	0.55
NA 399	TC00596	-73.35	-3.78	Peru	1	Nanay	0.997	*	0.925
NA 406	TC00804	-73.35	-3.78	Peru	1	Nanay	0.626	N/A	N/A
NA 409	TC00805	-73.35	-3.78	Peru	1	Iquitos	0.521	N/A	N/A
NA 427	TC00599	-73.35	-3.78	Peru	1	Nanay	0.998	Nanay I	0.983
NA 432	TC00600	-73.35	-3.78	Peru	1	Nanay	0.84	*	0.631
NA 435	TC00601	-73.35	-3.78	Peru	1	Nanay	0.998	Nanay I	0.992
NA 504	TC00604	-73.35	-3.78	Peru	1	Nanay	0.998	Nanay I	0.992
NA 507	TC00809	-73.35	-3.78	Peru	1	Nanay	0.998	Nanay I	0.51
NA 519	TC00810	-73.35	-3.78	Peru	1	Nanay	0.995	Nanay III	0.502
NA 528	TC00605	-73.35	-3.78	Peru	1	Nanay	0.625	N/A	N/A
NA 670	TC00815	-73.35	-3.78	Peru	1	Nanay	0.781	*	0.601
NA 672	TC00608	-73.35	-3.78	Peru	1	Nanay	0.998	Nanay I	0.993
NA 673	TC00816	-73.35	-3.78	Peru	1	Contamana	0.915	Nanay VII	0.999
NA 674	TC00609	-73.35	-3.78	Peru	1	Nanay	0.997	Nanay III	0.978
NA 675	TC00610	-73.35	-3.78	Peru	1	Nanay	0.998	Nanay I	0.991
NA 678	TC00611	-73.35	-3.78	Peru	1	Nanay	0.998	Nanay III	0.993
NA 685	TC00817	-73.35	-3.78	Peru	1	Nanay	0.993	Nanay III	0.973
NA 687	TC00614	-73.35	-3.78	Peru	1	Nanay	0.996	Nanay I	0.981
NA 689	TC00615	-73.35	-3.78	Peru	1	Nanay	0.998	Nanay I	0.989
NA 694	TC00620	-73.35	-3.78	Peru	1	Contamana	0.875	Nanay VII	0.999
NA 695	TC00621	-73.35	-3.78	Peru	1	Contamana	0.831	Nanay VII	0.999
NA 697	TC00622	-73.35	-3.78	Peru	1	Nanay	0.998	Nanay III	0.599
NA 699	TC00818	-73.35	-3.78	Peru	1	Nanay	0.75	*	0.649
NA 702	TC00930	-73.35	-3.78	Peru	1	Nanay	0.976	Nanay III	0.855
NA 705	TC05137	-73.35	-3.78	Peru	1	Nanay	0.998	Nanay I	0.524
NA 708	TC00627	-73.35	-3.78	Peru	1	Nanay	0.998	Nanay III	0.992
NA 710	TC00623	-73.35	-3.78	Peru	1	Nanay	0.997	Nanay I	0.527
NA 711	TC00628	-73.35	-3.78	Peru	1	Contamana	0.86	Nanay VII	0.978
NA 712	TC00629	-73.35	-3.78	Peru	2	Nacional	0.383	N/A	N/A
NA 713	TC00630	-73.35	-3.78	Peru	1	Contamana	0.546	N/A	N/A
NA 715	TC00631	-73.35	-3.78	Peru	1	Nanay	0.993	Nanay III	0.551
NA 718	TC00632	-73.35	-3.78	Peru	1	Nanay	0.998	Nanay III	0.991
NA 719	TC00633	-73.35	-3.78	Peru	1	Nanay	0.997	*	0.974
NA 720	TC00634	-73.35	-3.78	Peru	1	Nanay	0.833	*	0.523
NA 728	TC00638	-73.35	-3.78	Peru	1	Nanay	0.998	Nanay III	0.983
NA 730	TC00639	-73.35	-3.78	Peru	1	Nanay	0.998	Nanay I	0.992
NA 732	TC00821	-73.35	-3.78	Peru	1	Nanay	0.998	Nanay III	0.501
NA 739	TC00931	-73.35	-3.78	Peru	1	Contamana	0.882	Nanay VII	0.999
NA 746	TC00641	-73.35	-3.78	Peru	1	Nanay	0.932	*	0.602
NA 747	TC00932	-73.35	-3.78	Peru	1	Contamana	0.836	Nanay VII	0.993
NA 753	TC00642	-73.35	-3.78	Peru	1	Nanay	0.711	*	0.991
NA 756	TC00643	-73.35	-3.78	Peru	1	Nanay	0.993	Nanay III	0.983
NA 763	TC00933	-73.35	-3.78	Peru	1	Nanay	0.882	Nanay III	0.482
NA 766	TC00645	-73.35	-3.78	Peru	1	Nanay	0.998	Nanay I	0.991
NA 768	TC01187	-73.35	-3.78	Peru	1	Nanay	0.535	N/A	N/A
NA 770	TC00646	-73.35	-3.78	Peru	1	Nanay	0.998	Nanay I	0.991
NA 771	TC00541	-73.35	-3.78	Peru	1	Nanay	0.975	Nanay III	0.952
NA 773	TC00824	-73.35	-3.78	Peru	1	Nanay	0.998	Nanay I	0.994
NA 796	TC00936	-73.35	-3.78	Peru	1	Nanay	0.846	*	0.654
NA 802	TC00938	-73.35	-3.78	Peru	1	Nanay	0.997	Nanay I	0.989
NA 804	TC00939	-73.35	-3.78	Peru	1	Nanay	0.887	*	0.501
NA 807	TC00940	-73.35	-3.78	Peru	1	Nanay	0.621	N/A	N/A
NA 824	TC00825	-73.35	-3.78	Peru	1	Nanay	0.836	*	0.579
NA 831	TC00826	-73.35	-3.78	Peru	1	Nanay	0.602	N/A	N/A
NA 841	TC02726	-73.35	-3.78	Peru	1	Nanay	0.79	*	0.698
NA 847	TC00943	-73.35	-3.78	Peru	1	Nanay	0.802	Nanay II	0.962
NA 860	TC00944	-73.35	-3.78	Peru	1	Nanay	0.983	Nanay I	0.953
NA 867	TC00652	-73.35	-3.78	Peru	1	Nanay	0.953	*	0.988
NA 877	TC00945	-73.35	-3.78	Peru	1	Nanay	0.998	Nanay I	0.99
NA 888	TC00654	-73.35	-3.78	Peru	1	Nanay	0.954	*	0.984
NA 929	TC00658	-73.35	-3.78	Peru	1	Nanay	0.997	Nanay I	0.991
NA 937	TC00946	-73.35	-3.78	Peru	1	Nanay	0.997	Nanay III	0.499
NA 950	TC00451	-73.35	-3.78	Peru	1	Nanay	0.683	N/A	N/A
NA 1/19	TC00896	-73.35	-3.78	Peru	1	Nanay	0.609	N/A	N/A
NAP 1	TC02963	-76.33	-0.5	Ecuador	1	Curaray	0.644	N/A	N/A
NAP 3	TC02964	-76.33	-1.33	Ecuador	1	Curaray	0.647	N/A	N/A
NAP 19	TC01518	-77	-0.5	Ecuador	1	Curaray	0.997	Coca R - Napo R	0.811
NAP 24	TC01486	-77	-0.5	Ecuador	1	Curaray	0.997	Coca R - Napo R	0.982
NAP 25	TC01149	-77	-0.5	Ecuador	1	Curaray	0.994	Coca R - Napo R	0.858
NAP 30	TC01159	-77	-0.5	Ecuador	1	Curaray	0.846	Coca R - Napo R	0.566
NAP 30	TC02966	-77	-0.5	Ecuador	1	Curaray	0.996	Coca R - Napo R	0.945
NAP 41 (ARBOL 1)	TC00389	-77	-0.5	Ecuador	1	Curaray	0.992	Coca R - Napo R	0.981
NOPT 1	TC00158	-39.4	-14.77	Brazil	2	Amelonado	0.995	Amelonado Type II	0.586
Original Amelonado 1	TC02711	1.46	7.06	Ghana	2	Amelonado	0.987	Amelonado Type I	0.996
Original Amelonado 2	TC02712	1.46	7.06	Ghana	2	Amelonado	0.997	Amelonado Type I	0.976
OYA 4	TC02223	-52.57	2.52	French Guiana	2	Amelonado	0.583	N/A	N/A
OYA 2A	TC02201	-52.62	2.43	French Guiana	2	Amelonado	0.633	N/A	N/A
P 14A	TC01184	-73.35	-3.78	Peru	2	Iquitos	0.627	N/A	N/A
P2 6C	TC00545	-73.35	-3.78	Peru	1	Nanay	0.967	Nanay III	0.464
P 27C	TC00546	-73.35	-3.78	Peru	1	Marañón	0.673	N/A	N/A
P 8C	TC00465	-73.35	-3.78	Peru	1	Nanay	0.998	Nanay I	0.992
P 9A	TC00462	-73.35	-3.78	Peru	1	Nanay	0.996	Nanay III	0.663
PA 1	TC00948	-74.46	-4.57	Peru	1	Marañón	0.437	N/A	N/A
PA 2	TC00971	-74.46	-4.57	Peru	1	Marañón	0.881	Parinari III	0.659
PA 3	TC00515	-74.46	-4.57	Peru	1	Marañón	0.872	Parinari IV	0.648
PA 4	TC02720	-74.46	-4.57	Peru	1	Marañón	0.994	Parinari I	0.378
PA 12	TC00953	-74.46	-4.57	Peru	1	Marañón	0.965	Parinari IV	0.943
PA 13	TC00958	-74.46	-4.57	Peru	1	Marañón	0.911	Parinari III	0.936
PA 15	TC00664	-74.46	-4.57	Peru	1	Marañón	0.98	Parinari IV	0.951
PA 16	TC00503	-74.46	-4.57	Peru	1	Marañón	0.884	Parinari III	0.626
PA 18	TC00968	-74.46	-4.57	Peru	1	Marañón	0.969	Parinari III	0.956
PA 20	TC00972	-74.46	-4.57	Peru	1	Marañón	0.987	Parinari IV	0.859
PA 24	TC00973	-74.46	-4.57	Peru	1	Marañón	0.982	Parinari IV	0.81
PA 29	TC00512	-74.46	-4.57	Peru	1	Marañón	0.93	Parinari IV	0.897
PA 29 D214	TC05354	-74.46	-4.57	Peru	1	Marañón	0.991	Parinari I	0.981
PA 30	TC00847	-74.46	-4.57	Peru	1	Marañón	0.961	Parinari II	0.59
PA 32	TC00681	-74.46	-4.57	Peru	1	Marañón	0.988	Parinari II	0.893
PA 39	TC00851	-74.46	-4.57	Peru	1	Marañón	0.941	Parinari IV	0.697
PA 41	TC00683	-74.46	-4.57	Peru	1	Marañón	0.991	Parinari I	0.582
PA 45	TC00684	-74.46	-4.57	Peru	1	Marañón	0.982	Parinari I	0.549
PA 46	TC00978	-74.46	-4.57	Peru	1	Marañón	0.973	Parinari II	0.666
PA 49	TC00685	-74.46	-4.57	Peru	1	Marañón	0.965	Parinari I	0.541
PA 51	TC00686	-74.46	-4.57	Peru	1	Marañón	0.994	Parinari IV	0.86
PA 52	TC00852	-74.46	-4.57	Peru	1	Marañón	0.993	Parinari II	0.986
PA 53	TC00979	-74.46	-4.57	Peru	1	Marañón	0.981	Parinari II	0.969
PA 56	TC00980	-74.46	-4.57	Peru	1	Marañón	0.994	Parinari I	0.994
PA 61	TC00687	-74.46	-4.57	Peru	1	Marañón	0.953	Parinari III	0.85
PA 63	TC00981	-74.46	-4.57	Peru	1	Marañón	0.973	Parinari IV	0.637
PA 65	TC00982	-74.46	-4.57	Peru	1	Marañón	0.777	Parinari III	0.965
PA 67	TC00520	-74.46	-4.57	Peru	1	Marañón	0.744	Parinari III	0.979
PA 70	TC00688	-74.46	-4.57	Peru	1	Marañón	0.993	Parinari I	0.588
PA 71	TC00854	-74.46	-4.57	Peru	1	Marañón	0.995	Parinari I	0.681
PA 72	TC00689	-74.46	-4.57	Peru	1	Marañón	0.898	Parinari II	0.868
PA 73	TC00690	-74.46	-4.57	Peru	1	Marañón	0.996	Parinari I	0.976
PA 82	TC00691	-74.46	-4.57	Peru	1	Marañón	0.992	Parinari IV	0.955
PA 84	TC00692	-74.46	-4.57	Peru	1	Marañón	0.994	Parinari IV	0.575
PA 88	TC00983	-74.46	-4.57	Peru	1	Marañón	0.962	Parinari IV	0.941
PA 90	TC00521	-74.46	-4.57	Peru	1	Marañón	0.977	Parinari IV	0.721
PA 95	TC00856	-74.46	-4.57	Peru	1	Marañón	0.965	Parinari II	0.979
PA 98	TC00693	-74.46	-4.57	Peru	1	Marañón	0.935	Parinari I	0.436
PA 105	TC00949	-74.46	-4.57	Peru	1	Marañón	0.989	Parinari I	0.994
PA 107	TC00950	-74.46	-4.57	Peru	1	Marañón	0.942	Parinari III	0.918
PA 115	TC00951	-74.46	-4.57	Peru	1	Marañón	0.994	Parinari I	0.994
PA 118	TC00952	-74.46	-4.57	Peru	1	Marañón	0.971	Parinari IV	0.993
PA 120	TC00954	-74.46	-4.57	Peru	1	Marañón	0.995	Parinari I	0.993
PA 121	TC00955	-74.46	-4.57	Peru	1	Marañón	0.996	Parinari I	0.985
PA 123	TC00499	-74.46	-4.57	Peru	1	Marañón	0.994	Parinari I	0.554
PA 125	TC00956	-74.46	-4.57	Peru	1	Marañón	0.953	Parinari III	0.896
PA 126	TC00661	-74.46	-4.57	Peru	1	Marañón	0.968	Parinari IV	0.619
PA 128	TC00957	-74.46	-4.57	Peru	1	Marañón	0.981	Parinari II	0.596
PA 134	TC00960	-74.46	-4.57	Peru	1	Marañón	0.988	Parinari IV	0.987
PA 135	TC00961	-74.46	-4.57	Peru	1	Marañón	0.986	Parinari IV	0.991
PA 136	TC00662	-74.46	-4.57	Peru	1	Marañón	0.993	Parinari I	0.514
PA 137	TC00962	-74.46	-4.57	Peru	1	Marañón	0.995	Parinari I	0.994
PA 139	TC00963	-74.46	-4.57	Peru	1	Marañón	0.992	Parinari IV	0.985
PA 140	TC00964	-74.46	-4.57	Peru	1	Marañón	0.996	Parinari I	0.995
PA 141	TC00500	-74.46	-4.57	Peru	1	Marañón	0.993	Parinari IV	0.553
PA 149	TC00663	-74.46	-4.57	Peru	1	Marañón	0.887	Parinari I	0.987
PA 150	TC00501	-74.46	-4.57	Peru	1	Marañón	0.981	Parinari IV	0.787
PA 151	TC00502	-74.46	-4.57	Peru	1	Marañón	0.994	Parinari II	0.608
PA 157	TC00836	-74.46	-4.57	Peru	1	Marañón	0.968	Parinari IV	0.71
PA 165	TC00665	-74.46	-4.57	Peru	1	Marañón	0.994	Parinari I	0.901
PA 168	TC00965	-74.46	-4.57	Peru	1	Marañón	0.993	Parinari I	0.631
PA 169	TC00667	-74.46	-4.57	Peru	1	Marañón	0.992	Parinari IV	0.921
PA 171	TC00504	-74.46	-4.57	Peru	1	Marañón	0.991	Parinari IV	0.911
PA 173	TC00837	-74.46	-4.57	Peru	1	Marañón	0.939	Parinari IV	0.989
PA 175	TC02724	-74.46	-4.57	Peru	1	Marañón	0.912	Parinari II	0.798
PA 176	TC00966	-74.46	-4.57	Peru	1	Marañón	0.992	Parinari I	0.941
PA 179	TC00967	-74.46	-4.57	Peru	1	Marañón	0.994	Parinari IV	0.945
PA 184	TC00838	-74.46	-4.57	Peru	1	Marañón	0.976	Parinari IV	0.656
PA 185	TC00669	-74.46	-4.57	Peru	1	Marañón	0.981	Parinari IV	0.991
PA 186	TC00969	-74.46	-4.57	Peru	1	Marañón	0.99	Parinari II	0.442
PA 187	TC00970	-74.46	-4.57	Peru	1	Marañón	0.57	N/A	N/A
PA 188	TC00671	-74.46	-4.57	Peru	1	Marañón	0.894	Parinari IV	0.665
PA 189	TC00672	-74.46	-4.57	Peru	1	Marañón	0.989	Parinari II	0.564
PA 191	TC00839	-74.46	-4.57	Peru	1	Marañón	0.992	Parinari IV	0.582
PA 194	TC00840	-74.46	-4.57	Peru	1	Marañón	0.733	Parinari III	0.913
PA 195	TC00841	-74.46	-4.57	Peru	1	Marañón	0.979	Parinari I	0.842
PA 196	TC00673	-74.46	-4.57	Peru	1	Marañón	0.929	Parinari IV	0.731
PA 200	TC00505	-74.46	-4.57	Peru	1	Marañón	0.973	Parinari IV	0.987
PA 202	TC00842	-74.46	-4.57	Peru	1	Marañón	0.933	Parinari IV	0.707
PA 203	TC00506	-74.46	-4.57	Peru	1	Marañón	0.994	Parinari I	0.982
PA 207	TC00843	-74.46	-4.57	Peru	1	Marañón	0.994	Parinari IV	0.922
PA 211	TC00676	-74.46	-4.57	Peru	1	Marañón	0.95	Parinari I	0.986
PA 218	TC00507	-74.46	-4.57	Peru	1	Marañón	0.892	Parinari III	0.809
PA 271	TC00509	-74.46	-4.57	Peru	1	Marañón	0.994	Parinari I	0.976
PA 272	TC00674	-74.46	-4.57	Peru	1	Marañón	0.769	Parinari III	0.986
PA 279	TC00974	-74.46	-4.57	Peru	1	Marañón	0.995	Parinari I	0.99
PA 289	TC00511	-74.46	-4.57	Peru	1	Marañón	0.868	Parinari I	0.959
PA 293	TC00678	-74.46	-4.57	Peru	1	Marañón	0.956	Parinari IV	0.757
PA 294	TC00845	-74.46	-4.57	Peru	1	Marañón	0.991	Parinari II	0.846
PA 296	TC00679	-74.46	-4.57	Peru	1	Marañón	0.963	Parinari IV	0.722
PA 297	TC00846	-74.46	-4.57	Peru	1	Marañón	0.994	Parinari I	0.992
PA 299	TC00514	-74.46	-4.57	Peru	1	Marañón	0.994	Parinari I	0.991
PA 300	TC05343	-74.46	-4.57	Peru	1	Marañón	0.985	Parinari II	0.543
PA 301	TC00680	-74.46	-4.57	Peru	1	Marañón	0.989	Parinari I	0.994
PA 303	TC00516	-74.46	-4.57	Peru	1	Marañón	0.995	Parinari I	0.993
PA 310	TC00848	-74.46	-4.57	Peru	1	Marañón	0.957	Parinari II	0.524
PA 312	TC00849	-74.46	-4.57	Peru	1	Marañón	0.866	Parinari III	0.921
PER 2	TC03042	-73.96	11.32	Colombia	1	Criollo	0.998	*	0.925
PIŇA	TC02215	-52.83	2.27	French Guiana	2	Guiana	0.768	*	0.97
POUND 1/B	TC00857	-73.35	-3.78	Peru	1	Nanay	0.992	Nanay I	0.984
POUND 10/B	TC00858	-73.35	-3.78	Peru	1	Nanay	0.994	Nanay III	0.788
POUND 12/A	TC00860	-73.35	-3.78	Peru	2	Iquitos	0.645	N/A	N/A
POUND 15/A	TC00861	-73.35	-3.78	Peru	1	Nanay	0.998	Nanay I	0.588
POUND 16/B	TC00862	-73.35	-3.78	Peru	1	Nanay	0.651	N/A	N/A
POUND 2/A	TC00865	-73.35	-3.78	Peru	1	Nanay	0.998	Nanay I	0.993
POUND 2/B	TC00866	-73.35	-3.78	Peru	1	Nanay	0.995	Nanay I	0.986
POUND 21/B	TC00867	-73.35	-3.78	Peru	2	Iquitos	0.668	N/A	N/A
POUND 25/C	TC00869	-73.35	-3.78	Peru	1	Nanay	0.995	*	0.489
POUND 26/C	TC00870	-73.35	-3.78	Peru	1	Nanay	0.998	Nanay I	0.516
POUND 31/C	TC00873	-73.35	-3.78	Peru	1	Contamana	0.987	Scavina	0.793
POUND 32/A	TC00874	-73.35	-3.78	Peru	1	Nanay	0.997	Nanay I	0.993
POUND 5/C	TC00877	-73.35	-3.78	Peru	1	Nanay	0.993	Nanay III	0.578
POUND 7/C	TC00880	-73.35	-3.78	Peru	1	Nanay	0.545	N/A	N/A
RANCHITO 1	TC03066	-103.71	18.45	Mexico	1	Criollo	0.998	Lacandona	0.99
RB 33 PL1	TC02519	-67.82	-9.98	Brazil	1	Purús	0.995	Acre R	0.985
RB 37 PL2	TC02520	-67.83	-9.5	Brazil	1	Purús	0.99	Acre R	0.98
RB 38 PL6	TC02521	-67.83	-9.5	Brazil	1	Purús	0.994	Acre R	0.993
RB 39 PL1	TC02522	-67.83	-9.5	Brazil	1	Purús	0.994	Acre R	0.993
RB 40	TC00449	-67.83	-9.5	Brazil	1	Purús	0.993	Acre R	0.984
RB 40 PL1	TC02523	-67.83	-9.5	Brazil	1	Purús	0.995	Acre R	0.997
RB 41 PL1	TC02524	-67.82	-9.98	Brazil	1	Purús	0.996	Acre R	0.726
RB 42 PL5	TC02525	-67.82	-9.98	Brazil	1	Purús	0.995	Acre R	0.997
RB 45 PL1	TC02526	-67.82	-9.98	Brazil	1	Purús	0.993	Acre R	0.784
RB 46 PL4	TC02527	-67.82	-9.98	Brazil	1	Purús	0.996	Acre R	0.897
RB 47 PL3	TC02518	-67.82	-9.98	Brazil	1	Purús	0.994	Acre R	0.963
RB 48 PL1	TC02517	-67.82	-9.98	Brazil	1	Purús	0.996	Acre R	0.988
SAN 9	TC01515	-76.83	0.35	Ecuador	1	Curaray	0.997	Coca R - Napo R	0.992
SAUCITO 1	TC03067	-103.71	18.45	Mexico	1	Criollo	0.997	Lacandona	0.988
SCA 3	TC00698	-75.01	-7.34	Peru	1	Contamana	0.997	Scavina	0.997
SCA 5	TC00884	-75.01	-7.34	Peru	1	Contamana	0.996	Scavina	0.997
SCA 6 (PLA 2 Brazil)	TC03004	-75.01	-7.34	Peru	1	Contamana	0.997	Scavina	0.997
SCA 7	TC00699	-75.01	-7.34	Peru	1	Contamana	0.996	Scavina	0.998
SCA 8	TC00444	-75.01	-7.34	Peru	1	Contamana	0.997	Scavina	0.994
SCA 9	TC00986	-75.01	-7.34	Peru	1	Contamana	0.991	Scavina	0.969
SCA 11	TC00694	-75.01	-7.34	Peru	1	Contamana	0.994	Scavina	0.992
SCA 12	TC00695	-75.01	-7.34	Peru	1	Contamana	0.996	Scavina	0.995
SCA 19	TC00522	-75.01	-7.34	Peru	1	Contamana	0.996	Scavina	0.998
SIAL 20	TC00175	-39.4	-14.77	Brazil	2	Amelonado	0.996	Amelonado Type II	0.972
SIAL 20	TC00184	-39.4	-14.77	Brazil	2	Amelonado	0.997	Amelonado Type II	0.986
SIAL 70	TC00185	-39.4	-14.77	Brazil	2	Amelonado	0.997	Amelonado Type I	0.769
SIAL 84	TC00176	-39.4	-14.77	Brazil	2	Amelonado	0.997	Amelonado Type II	0.962
SIAL 84	TC00186	-39.4	-14.77	Brazil	2	Amelonado	0.997	Amelonado Type II	0.971
SIAL 88	TC00178	-39.4	-14.77	Brazil	2	Amelonado	0.998	Amelonado Type II	0.939
SIAL 169	TC00179	-39.4	-14.77	Brazil	2	Amelonado	0.997	Amelonado Type II	0.993
SIAL 169	TC00187	-39.4	-14.77	Brazil	2	Amelonado	0.998	Amelonado Type II	0.995
SIAL 283	TC00188	-39.4	-14.77	Brazil	2	Amelonado	0.997	Amelonado Type II	0.979
SIAL 325	TC00177	-39.4	-14.77	Brazil	2	Amelonado	0.997	Amelonado Type I	0.782
SIAL 407	TC00189	-39.4	-14.77	Brazil	2	Amelonado	0.997	Amelonado Type I	0.968
SIAL 505	TC00180	-39.4	-14.77	Brazil	2	Amelonado	0.997	Amelonado Type II	0.991
SIAL 505	TC00190	-39.4	-14.77	Brazil	2	Amelonado	0.997	Amelonado Type II	0.895
SIAL 512	TC00191	-39.4	-14.77	Brazil	2	Amelonado	0.996	Amelonado Type I	0.585
SIAL 543	TC00192	-39.4	-14.77	Brazil	2	Amelonado	0.997	Amelonado Type II	0.996
SIAL 628	TC00181	-39.4	-14.77	Brazil	2	Amelonado	0.997	Amelonado Type I	0.884
SIC 02	TC00193	-39.4	-14.77	Brazil	2	Amelonado	0.997	Amelonado Type I	0.774
SIC 19	TC00194	-39.4	-14.77	Brazil	2	Amelonado	0.997	Amelonado Type II	0.912
SIC 23	TC00195	-39.4	-14.77	Brazil	2	Amelonado	0.997	Amelonado Type II	0.728
SIC 328	TC00196	-39.4	-14.77	Brazil	2	Amelonado	0.997	Amelonado Type II	0.994
SIC 662	TC00197	-39.4	-14.77	Brazil	2	Amelonado	0.997	Amelonado Type I	0.825
SIC 801	TC00198	-39.4	-14.77	Brazil	2	Amelonado	0.997	Amelonado Type I	0.995
SIC 802	TC00199	-39.4	-14.77	Brazil	2	Amelonado	0.997	Amelonado Type I	0.996
SIC 806	TC00200	-39.4	-14.77	Brazil	2	Amelonado	0.993	Amelonado Type I	0.993
SIC 961	TC00201	-39.4	-14.77	Brazil	2	Amelonado	0.996	Amelonado Type I	0.992
SILECIA 1	TC02967	-77.81	-0.91	Ecuador	1	Curaray	0.811	Curaray R - Napo R	0.652
SILECIA 5	TC02968	-77.81	-0.91	Ecuador	1	Curaray	0.394	N/A	N/A
SJU 1	TC03039	-71.92	11.45	Venezuela	1	Criollo	0.993	*	0.953
SJU 3	TC03040	-71.92	11.45	Venezuela	1	Criollo	0.998	*	0.781
SJU 6	TC03041	-71.92	11.45	Venezuela	1	Criollo	0.996	*	0.983
SM 8	TC02969	-76.83	0.33	Ecuador	1	Curaray	0.658	N/A	N/A
SM 9	TC02970	-76.835	0.33	Ecuador	1	Curaray	0.54	N/A	N/A
SPEC 41/6 18	TC05193	-67.83	-4.08	Colombia	3	Amelonado	0.584	N/A	N/A
SPEC 54/1	TC05194	-69	-1	Colombia	3	Iquitos	0.549	N/A	N/A
STA MARIA 2	TC03068	-103.71	18.45	Mexico	1	Criollo	0.998	Lacandona	0.98
TAP 1	TC00384	-73.86	-5	Peru	2	Nacional	0.498	N/A	N/A
TAP 2	TC01154	-73.86	-5	Peru	1	Contamana	0.527	N/A	N/A
TAP 2	TC00372	-73.86	-5	Peru	2	Nacional	0.603	N/A	N/A
TAP 3	TC00385	-73.86	-5	Peru	1	Contamana	0.522	N/A	N/A
TAP 5	TC02971	-73.86	-5	Peru	2	Nacional	0.674	N/A	N/A
TAP 7	TC00373	-73.86	-5	Peru	2	Nacional	0.667	N/A	N/A
TAP 8	TC01142	-73.86	-5	Peru	2	Nacional	0.661	N/A	N/A
TC 1	TC03463	-78.21	8.23	Panama	1	Criollo	0.996	*	0.992
TC 3	TC03465	-78.21	8.23	Panama	1	Criollo	0.995	*	0.99
TC 9	TC03464	-78.21	8.23	Panama	1	Criollo	0.996	*	0.992
THCA	TC03060	-91.1	16.94	Mexico	1	Criollo	0.996	Lacandona	0.927
TIP 1	TC01521	-76.83	-1	Ecuador	1	Curaray	0.561	N/A	N/A
TIP 4	TC00477	-76.83	-1	Ecuador	1	Curaray	0.785	Curaray R - Napo R	0.705
TIP 6	TC00479	-76.83	-1	Ecuador	1	Curaray	0.675	N/A	N/A
U 1	TC02987	-75.17	-7.35	Peru	1	Contamana	0.995	Scavina	0.935
U 2	TC02986	-75.17	-7.35	Peru	2	Contamana	0.509	N/A	N/A
U 3	TC02984	-75.17	-7.35	Peru	1	Contamana	0.996	Scavina	0.99
U 4	TC01205	-73.83	-5	Peru	1	Contamana	0.996	Scavina	0.993
U 5	TC02981	-75.17	-7.35	Peru	1	Contamana	0.993	Scavina	0.66
U 6	TC01208	-75.28	-7.18	Peru	1	Contamana	0.997	Scavina	0.997
U 7	TC02982	-75.17	-7.35	Peru	2	Contamana	0.939	Vilcanota	0.997
U 9	TC01209	-75.17	-7.35	Peru	1	Nanay	0.468	N/A	N/A
U 10	TC03018	-75.17	-7.35	Peru	2	Iquitos	0.301	N/A	N/A
U 11	TC01207	-75.17	-7.35	Peru	1	Contamana	0.996	Scavina	0.994
U 12	TC03019	-75.28	-7.18	Peru	1	Contamana	0.38	N/A	N/A
U 15	TC01210	-75.27	-7.1	Peru	1	Contamana	0.973	*	0.536
U 19	TC01211	-75.5	-6.83	Peru	1	Contamana	0.914	Scavina	0.513
U 20	TC03017	-75.5	-6.83	Peru	1	Contamana	0.981	*	0.688
U 21	TC01212	-75.25	-6.5	Peru	1	Contamana	0.51	N/A	N/A
U 22	TC02980	-75.25	-6.5	Peru	2	Nacional	0.594	N/A	N/A
U 24	TC02983	-74.25	-5.5	Peru	1	Contamana	0.909	*	0.665
U 26	TC03000	-73.83	-5.12	Peru	2	Nacional	0.634	N/A	N/A
U 28	TC02998	-73.83	-5.12	Peru	1	Contamana	0.986	*	0.802
U 30	TC02996	-73.83	-5.12	Peru	3	Iquitos	0.44	N/A	N/A
U 31	TC02995	-73.83	-5.12	Peru	1	Contamana	0.789	*	0.522
U 32	TC02999	-73.83	-5.12	Peru	2	Nacional	0.57	N/A	N/A
U 35	TC02989	-75.08	-7.5	Peru	1	Contamana	0.996	Scavina	0.996
U 36	TC02994	-75.42	-7.5	Peru	1	Contamana	0.994	Scavina	0.836
U 37	TC02992	-75.42	-7.5	Peru	1	Contamana	0.995	Scavina	0.945
U 38	TC02993	-75.42	-7.5	Peru	1	Contamana	0.843	*	0.994
U 39	TC02991	-75.42	-7.5	Peru	1	Contamana	0.988	Scavina	0.982
U 41	TC02990	-73.83	-6.83	Peru	1	Contamana	0.988	Scavina	0.779
U 43	TC02988	-73.83	-6.83	Peru	2	Contamana	0.991	Vilcanota	0.998
U 45	TC03009	-74.3	-8.6	Peru	2	Contamana	0.992	Scavina	0.529
U 47	TC03011	-74.3	-8.6	Peru	2	Contamana	0.955	Vilcanota	0.997
U 48	TC03010	-74.3	-8.6	Peru	1	Contamana	0.996	Scavina	0.993
U 49	TC03012	-74.73	-8.92	Peru	1	Contamana	0.997	Scavina	0.997
U 51	TC03021	-74.58	-9.36	Peru	1	Contamana	0.996	Scavina	0.994
U 54	TC03007	-72.67	-12.08	Peru	1	Contamana	0.99	Scavina	0.921
U 55	TC02997	-72.67	-12.08	Peru	1	Contamana	0.996	Scavina	0.992
U 56	TC03001	-72.67	-12.08	Peru	2	Contamana	0.987	Vilcanota	0.999
U 57	TC03002	-72.67	-12.08	Peru	1	Contamana	0.968	Scavina	0.796
U 58	TC03015	-72.67	-12.08	Peru	2	Contamana	0.704	*	0.996
U 59	TC03014	-72.67	-12.63	Peru	2	Contamana	0.744	*	0.997
U 66	TC01206	-73.17	-12.67	Peru	2	Contamana	0.989	Vilcanota	0.989
U 68	TC02985	-72.67	-12.08	Peru	1	Contamana	0.549	N/A	N/A
U 69	TC01204	-72.67	-12.08	Peru	2	Contamana	0.95	Vilcanota	0.998
U 70	TC03016	-72.67	-12.08	Peru	2	Contamana	0.995	Vilcanota	0.999
UCA 1	TC01141	-73.83	-5	Peru	1	Contamana	0.422	N/A	N/A
UCA 3	TC01140	-73.83	-5	Peru	2	Nacional	0.61	N/A	N/A
VIL 2 (ARBOL 3)	TC00378	-76	-1.5	Ecuador	1	Curaray	0.888	Curaray R - Napo R	0.547
WILD	TC00398	-78.62	0.39	Ecuador	1	Criollo	0.861	*	0.995
YAL 3	TC02226	-52.73	2.62	French Guiana	2	Guiana	0.583	N/A	N/A
YAL 1A	TC02199	-52.77	2.58	French Guiana	2	Amelonado	0.681	N/A	N/A
YAL 5A	TC02193	-52.72	2.6	French Guiana	2	Amelonado	0.498	N/A	N/A
YAL 6A	TC02195	-52.72	2.6	French Guiana	2	Guiana	0.616	N/A	N/A
YAL 7A	TC02208	-52.72	2.6	French Guiana	2	Amelonado	0.641	N/A	N/A
N.C.S.: Number of clustering schemes.
