# Supplementary material for: Geographic and Genetic Population Differentiation of the Amazonian Chocolate Tree (Theobroma cacao L)
Source: PLoS One. 2008 Oct 1;3(10):e3311. doi: 10.1371/journal.pone.0003311 (PMC2551746; doi:10.1371/journal.pone.0003311)
Supplement: Table S5 — Estimates of gene flow (Nm) among subclusters based on F statistics. (0.04 MB XLS) [file pone.0003311.s005.xls]

## Sheet: Feuil1
	Subcluster	Parinari III C	Parinari II C	Parinari IV C	Ji-Paraná R	Parinari I C	Camopi R	Camopi R-Euleupousing R	Kérindioutou R	Scavina C	Embira R	Vilcanota R	Nanay VII C	Bobonaza R	Upano R	Coca R - Napo R	Curaray R - Napo R	Nanay II C	Nanay III C	Nanay I C	Middle Solimões R	IMC II C	Amazonas C	IMC I C	Nacional C	Morona C	Acre R	Upper Solimões R - Iça R	Purús R	Caeté R - Purús R	Santa Marta	Lacandona	Belize	Amelonado Type I C	Uatama R	Amelonado Type III C	Amelonado Type II C
	Parinari III C						0.6291	0.6476	0.4385	0.7938	0.8897	0.5955	0.5616	0.5541	0.6285	0.5208	0.6719	0.5742	0.4202	0.4102	0.9833	1.0641	1.0275	1.0231	0.3413	0.5552	1.023	0.9753	0.9731	0.9641	0.2316	0.2222	0.2423	0.5358	0.365	0.9332	0.5983
	Parinari II C						0.4912	0.5275	0.3499	0.5871	0.6413	0.4384	0.3811	0.4029	0.4626	0.3877	0.4654	0.422	0.3348	0.3253	0.7823	0.7388	0.7123	0.7426	0.2322	0.3783	0.7682	0.7325	0.6988	0.7217	0.1578	0.1544	0.1673	0.4495	0.2742	0.814	0.5188
	Parinari IV C						0.6247	0.6251	0.4308	0.6396	0.7791	0.5138	0.4651	0.502	0.5155	0.4045	0.5444	0.5362	0.3731	0.3521	1.1059	0.9289	0.9478	0.8822	0.2609	0.4251	0.8691	0.9186	0.8884	0.8335	0.2126	0.1975	0.2241	0.552	0.3697	1.048	0.608
	Ji-Paraná R						0.433	0.3728	0.3207	0.5002	0.5705	0.419	0.357	0.4487	0.4697	0.3502	0.4664	0.3501	0.2481	0.2339	0.6363	0.6394	0.6226	0.5577	0.2128	0.3631	0.71	0.656	0.7542	0.6367	0.1825	0.1677	0.193	0.2982	0.2175	0.4869	0.302
	Parinari I C						0.5143	0.4935	0.3358	0.5264	0.6296	0.4226	0.3695	0.4044	0.4193	0.3303	0.4361	0.4043	0.2984	0.2709	0.7972	0.7299	0.731	0.6867	0.2038	0.3434	0.6761	0.7219	0.6897	0.6545	0.1646	0.1536	0.1756	0.4063	0.3	0.7628	0.4366
	Camopi R									0.3242	0.3373	0.2297	0.1998	0.2209	0.2584	0.2041	0.2686	0.1817	0.1502	0.1343	0.3843	0.4142	0.397	0.4219	0.1081	0.1975	0.3844	0.4255	0.3572	0.3572	0.0669	0.0629	0.0761	0.1731	0.1001	0.3229	0.201
	Camopi R-Euleupousing R									0.3087	0.3438	0.2373	0.1972	0.2244	0.2502	0.1893	0.2594	0.1864	0.1341	0.1173	0.4059	0.4031	0.4166	0.3906	0.0977	0.1905	0.368	0.4201	0.3655	0.3544	0.0716	0.0628	0.0821	0.163	0.1103	0.3658	0.1844
	Kérindioutou R									0.2554	0.2629	0.1735	0.1398	0.1561	0.2037	0.156	0.2029	0.1217	0.0901	0.0777	0.2791	0.3083	0.2923	0.3215	0.0662	0.1337	0.3047	0.32	0.2575	0.2791	0.0292	0.0291	0.0368	0.101	0.368	0.216	0.1288
	Scavina C													0.5831	0.644	0.53	0.7186	0.3697	0.286	0.2651	0.6303	0.7338	0.703	0.6465	0.3431	0.556	0.6496	0.7132	0.6514	0.6582	0.2481	0.2358	0.2599	0.3102	0.2516	0.4834	0.3287
	Embira R													0.552	0.6527	0.581	0.6993	0.3624	0.3007	0.2962	0.6251	0.7543	0.6722	0.7514	0.3229	0.5056	0.7985	0.7595	0.7209	0.7893	0.2237	0.2178	0.2313	0.3469	0.2371	0.4997	0.3842
	Vilcanota R													0.3937	0.466	0.3808	0.4668	0.2601	0.2079	0.2054	0.4588	0.5362	0.507	0.5157	0.2466	0.3668	0.5107	0.5295	0.4742	0.5305	0.1782	0.1726	0.19	0.2308	0.1625	0.3324	0.2587
	Nanay VII C													0.39	0.4439	0.3799	0.5063	0.2525	0.1893	0.1822	0.4457	0.5722	0.5066	0.5215	0.2376	0.4217	0.4981	0.4602	0.4596	0.4866	0.1348	0.1304	0.1469	0.2014	0.1348	0.3094	0.2296
	Bobonaza R																	0.2644	0.2087	0.2053	0.4524	0.5299	0.491	0.5386	0.3012	0.4404	0.5129	0.5269	0.4727	0.516	0.16	0.1573	0.17	0.22	0.1462	0.3114	0.2481
	Upano R																	0.3206	0.2424	0.2292	0.5209	0.5987	0.5783	0.5688	0.3158	0.4623	0.5278	0.6144	0.5431	0.5509	0.2166	0.2008	0.2219	0.2384	0.1883	0.3909	0.2572
	Coca R - Napo R																	0.2517	0.1772	0.1622	0.4256	0.4786	0.4915	0.4337	0.2215	0.4035	0.4201	0.4793	0.4744	0.451	0.1662	0.1499	0.1771	0.1827	0.1489	0.3283	0.1932
	Curaray R - Napo R																	0.3068	0.2346	0.2234	0.5111	0.6621	0.602	0.6299	0.3787	0.6501	0.5616	0.6197	0.5707	0.582	0.1986	0.1912	0.2062	0.2457	0.1897	0.3893	0.2655
	Nanay II C																				0.6662	0.6839	0.7027	0.7691	0.1354	0.2228	0.4647	0.5686	0.4492	0.4659	0.0884	0.0831	0.0978	0.2084	0.1328	0.383	0.25
	Nanay III C																				0.4654	0.4404	0.461	0.4808	0.0884	0.1618	0.3163	0.4493	0.3368	0.3286	0.0633	0.0552	0.0717	0.1367	0.0908	0.3034	0.1585
	Nanay I C																				0.4626	0.4409	0.4503	0.4559	0.0803	0.155	0.3036	0.4209	0.3492	0.3168	0.0599	0.0502	0.0686	0.1215	0.0869	0.2919	0.1367
	Middle Solimões R																								0.2551	0.387	0.8041	1.1827	0.7667	0.7742	0.1768	0.1763	0.1872	0.4022	0.3326	0.7187	0.4644
	IMC II C																								0.3473	0.5867	0.7811	0.9652	0.7687	0.772	0.216	0.2086	0.2285	0.3992	0.3219	0.6571	0.442
	Amazonas C																								0.2975	0.468	0.8111	1.028	0.7827	0.7951	0.198	0.1955	0.2054	0.4182	0.327	0.6908	0.4463
	IMC I C																								0.3143	0.5182	0.7139	0.9955	0.7906	0.7448	0.2224	0.2099	0.231	0.4137	0.3558	0.7294	0.4327
	Nacional C																										0.246	0.2924	0.2656	0.2527	0.0709	0.0616	0.0801	0.09	0.0582	0.1797	0.1006
	Morona C																										0.4186	0.4556	0.41	0.4163	0.1301	0.1214	0.1372	0.1753	0.1208	0.2807	0.1966
	Acre R																														0.2087	0.1943	0.2189	0.3563	0.2756	0.5793	0.3784
	Upper Solimões R - Iça R																														0.2229	0.2141	0.2339	0.367	0.3188	0.6388	0.406
	Purús R																														0.1856	0.1806	0.1964	0.3341	0.2301	0.5265	0.3826
	Caeté R - Purús R																														0.2154	0.1998	0.2246	0.3274	0.2706	0.5551	0.3571
	Santa Marta																																	0.0617	0.0218	0.1078	0.077
	Lacandona																																	0.0551	0.0231	0.1084	0.0668
	Belize																																	0.0702	0.0281	0.116	0.0865
	Amelonado Type I C
	Uatama R
	Amelonado Type III C
	Amelonado Type II C
	Note: the boxes indicate populations within the same cluster as inferred from Structure
